# Supplementary material
Source: PubMed Central journal article supplement (PMC7330833)
Supplement: jamacardiol-e202221-s001.pdf [file jamacardiol-e202221-s001.pdf]

## Supplementary Online Content

Badhwar V, Vemulapalli S, Mack MA, et al. Volume-outcome association of mitral valve surgery in the United States. *JAMA Cardiol*. Published online July 1, 2020.  
doi:10.1001/jamacardio.2020.2221

**eMethods 1.** Data Linkage and Management of Missing Data

**eMethods 2.** ICD-9/10 Codes for 1-Year Outcomes

**eMethods 3.** Covariates for Model Adjustment

**eTable 1.** Hospital Mitral Valve Surgery Volume-Outcome Association Stratified by Volume Quartiles

**eTable 2.** Patient and Procedural Characteristics of Patients Linked and Not Linked to CMS Claims Data

**eTable 3.** Hospital 1-Year Death Time to Event Rates

**eTable 4.** Hospital 1-Year Heart Failure Hospitalization Time to Event Rates

**eTable 5.** Hospital 1-Year Mitral Valve Reoperation Time to Event Rates

**eTable 6.** All Surgeon Mitral Valve Surgery Volume-Outcome Association Stratified by Volume Quartiles

**eTable 7.** Experienced Surgeons Mitral Valve Surgery Volume-Outcome Association Stratified by Volume Quartiles

**eTable 8.** All Surgeon 1-Year Mortality Time to Event Rates

**eTable 9.** All Surgeon 1-Year HF Hospitalization Rates

**eTable 10.** All Surgeon 1-Year MV Reoperation Time to Event Rates

**eTable 11.** Experienced Surgeons 1-Year Mortality Time to Event Rates

**eTable 12.** Experienced Surgeon 1-Year HF Hospitalization Time to Event Rates

**eTable 13.** Experienced Surgeons 1-Year MV Reoperation Time to Event Rates

**eFigure 1.** Hospital- and Surgeon-Level Annualized Mitral Valve Repair and Replacement (MVRR) Volume

**eFigure 2.** Hospital-Level Linked CMS 1-Year Risk-Adjusted Mortality

**eFigure 3.** Hospital-Level Linked CMS 1-Year HF Hospitalization

**eFigure 4.** Hospital-Level Linked CMS 1-Year MV Reoperation

**eFigure 5.** Experienced Surgeon Sensitivity Analysis: 30-Day Volume-Outcome Association for Mortality, Composite Major Morbidity Plus Mortality, Attempted MV Repair Rate, Successful MV Repair Rate

**eFigure 6.** All Surgeon-Linked CMS 1-Year Risk-Adjusted Mortality

**eFigure 7.** All Surgeon-Linked CMS 1-Year HF Hospitalization

**eFigure 8.** All Surgeon-Linked CMS 1-Year MV Reoperation

**eFigure 9.** Experienced Surgeon-Linked CMS 1-Year Risk-Adjusted Mortality

**eFigure 10.** Experienced Surgeon-Linked CMS 1-Year HF Hospitalization

**eFigure 11.** Experienced Surgeon-Linked CMS 1-Year MV Reoperation

**eResults.** Surgeons With 3 Years of Experience

This supplementary material has been provided by the authors to give readers additional information about their work.

## **eMethods 1. Data Linkage and Management of Missing Data**

### **1. Linkage of the Society of Thoracic Surgeons Adult Cardiac Database to Centers for Medicare and Medicaid Services Administrative Claims:**

As the STS ACSD does not collect outcomes beyond 30 days, the STS ACSD was linked with 100% part-A CMS claims data using combinations of non-unique indirect identifiers (Jacobs JP, Edwards FH, Shahian DM, et al. Successful linking of The Society of Thoracic Surgeons adult cardiac surgery database to Centers for Medicare and Medicaid Services Medicare data. *Ann Thorac Surg* 2010;90:1150–7). Records in the two databases were considered to be the same patient if they matched on a set of indirect identifiers including hospital, date of birth, sex, admission date, and discharge date. The matching algorithm required an exact match on a few of these variables or partial matching on a larger number of variables.

### **2. Management of Missing Data:**

a) Missing covariates in the hierarchical models were less than 1% for all data elements except the following:

#### **Covariates – overall population**

IV-drug abuse (3.7%) , mediastinal radiation (2.6%), home oxygen (2.9%), liver disease (2%), medical insurance (1.4%), alcohol consumption (4%), white blood cells (1%), platelets (2.6%), ejection fraction (1.9%), HF more than 2 weeks before surgery (2.7%), Left Main disease (>50% stenosis) (1.1%), recent pneumonia (3.7%).

#### **Covariates – Linked population**

IV-drug abuse (3.7%) , mediastinal radiation (2.6%), home oxygen (3.2%), liver disease (2.2%), medical insurance (1.3 %), alcohol consumption (4%), platelets (2.6%), ejection fraction (1.8%), HF more than 2 weeks before surgery (2.7%), Left Main disease (>50% stenosis) (1.1%), recent pneumonia (3.8 %).

b) Missing covariate data was handled by single imputation:

c) Missing outcome data in the hierarchical models was:

Operative Mortality: 10.1%,

Composite: Operative Mortality (10.1%) + Major Morbidity (0.2%): Total 9.4%

MV Repair performed 0%

MV Repair successful: 11%

MV Repair attempted: 0.7% among Replacements, Total 0.1%

d) Missing outcome data was handled by multiple imputation. Specifically, we imputed outcome variables with missingness > 1% using PROC MI where the predictor variables were:

volcat1 volcat2 volcat3 volcat1alls volcat2alls volcat3alls age00 age60 age75 bsa1 bsa2 ifemale  
bmi1 bmi2 idialysis creat100 creat150 hct1 hct2 ifemalehct1 ifemalehct2 wbc1 imedadp5days  
imedadpidis ihypertn iimmsupp imedster ipvd ivdstena icvdpcarsurg iprcvint  
ipayorge65comhmo ipayorlt65mcare insufmeq4 insufteq4 insufteq3 irecentarrhythafibcont  
irecentarrhythafibparox chrlungdsev chrlungdmod chrlungdmild iremotecvdcva icvdtia  
idiabinsulin icardpresunstabang icardpresstabang statueq2 insufaeq3 insufaeq4 ilmaindis  
icardpresmi icigsmokercurr icigsmokerprev ipciepi ipciprior tvrepair surgdt ipayorlt65mcaid  
ipayorlt65mcaremcaid ipayorlt65selfnone ipayorlt65other milt1d mi1to21d black hispanic  
imedacei48 statusge2 iivdrugab imediastrad irecentpneu ihmo2 iliverdis alcoholnew classchf  
platelets hdef;

The outcomes of interest were operative mortality, major morbidity, and successful mitral valve repair. For the outcome of successful mitral valve repair, we included only those patients undergoing mitral valve repair and merged the imputed outcome with the imputed datasets using the overall population.

Treating volume as a categorical variable, odds ratios for hospital volume quartiles were derived using a hierarchical model (proc glimmix) to account for hospitals and surgeon clustering (random intercepts) and patients as fixed effects. We ran the procedure for each imputed dataset (5 total) and then aggregate results using PROC MIANALYZE. For adjusted hierarchical models, we first ran a logistic regression (by \_imputation\_) to obtain the XBETA estimates for each patient and then used these to adjust volume estimates in hierarchical model.

Treating volume as a continuous variable, we used the same approach as in main analysis, but using PROC MIANALYZE to get final estimates (parameter estimates, coefficients) and covariance matrix (tcov=total covariance matrix) and p-values for linearity and association (testmultstat), aggregating results from hierarchical models run in imputed datasets (parmsest and parmscovb).

A similar approach was used for multiple imputation of the surgeon level analysis.

## eMethods 2. ICD-9/10 Codes for 1-Year Outcomes

- Rehospitalization for Heart Failure:

ICD-9 codes: 398.x, 402.x1, 404.x1, 404.x3, 428.x (Primary Diagnosis Codes)

ICD-10 codes: I0981, I110, I130, I132, I502, I503, I504, I509 (Primary Diagnosis Codes)

- Mitral Valve Reoperation:

Reoperation – Mitral: MVr 35.12 / MVR 35.23 and 35.24 (Procedure codes)

ICD-10 codes: 027G04Z, 027G0DZ, 027G0ZZ, 02NG0ZZ, 02QG0ZZ, 02RG07Z, 02RG08Z, 02RG0JZ, 02RG0KZ

## eMethods 3. Covariates for Model Adjustment

In all models:

Demographics: age, gender

Risk factors: BMI, BSA, dialysis, hypertension, immunosuppressant therapy, PVD, carotid surgery, IV-drug abuse, mediastinal radiation, home oxygen, liver disease, previous CV interventions, medical insurance, chronic lung disease, CVA more than 2 weeks before surgery, TIA, alcohol consumption, diabetes-insulin, urgent operative status

Labs: creatinine, hematocrit, white blood cells, platelets,

Medications prior to surgery: ADP Inhibitors within 5 days, ADP inhibitors discontinuation (days prior to surgery), steroids.

Valve disease: Aortic valve stenosis, Mitral severe insufficiency, Tricuspid moderate/severe insufficiency

Cardiac status: ejection fraction, atrial fibrillation, unstable angina, stable angina, heart failure within 2 weeks-class NYHA, HF more than 2 weeks before surgery.

Mortality models and long-term outcomes models: Aortic valve insufficiency moderate/severe, Left Main disease (>50% stenosis), STEMI/Not STEMI on admission.

Composite models: Cigarette smoking, former and current, prior PCI, PCI during episode of care, Tricuspid valve repair, surgery date, previous MI and timing, recent pneumonia, race, ACE inhibitors within 48 hours,

MV repair models: Aortic valve insufficiency moderate/severe, Left Main disease (>50% stenosis), STEMI/Not STEMI on admission, cigarette smoking, former and current, prior PCI, PCI during episode of care, Tricuspid valve repair, surgery date, previous MI and timing, recent pneumonia, race, ACE inhibitors within 48 hours

**eTable 1. Hospital Mitral Valve Surgery Volume-Outcome Association Stratified by Volume Quartiles**

| <b>Hospital Level Analysis</b> | <b>Volume</b>     | <b>UNADJUSTED OR (95% CI)</b> | <b>P-value</b> | <b>ADJUSTED OR (95% CI)</b> | <b>P-value</b> |
|--------------------------------|-------------------|-------------------------------|----------------|-----------------------------|----------------|
| Operative Mortality            | Quartile 1 vs Q4  | 2.21(1.57,3.12)               | <.0001         | 2.06(1.47,2.90)             | <.0001         |
|                                | Quartile 2 vs. Q4 | 1.95(1.53,2.50)               | <.0001         | 1.78(1.40,2.26)             | <.0001         |
|                                | Quartile 3 vs. Q4 | 1.52(1.24,1.86)               | <.0001         | 1.48(1.22,1.80)             | <.0001         |
| Composite                      | Quartile 1 vs Q4  | 1.40(1.18,1.67)               | 0.0001         | 1.35(1.15,1.60)             | 0.0004         |
|                                | Quartile 2 vs. Q4 | 1.29(1.14,1.47)               | <.0001         | 1.22(1.09,1.37)             | 0.0009         |
|                                | Quartile 3 vs. Q4 | 1.04(0.93,1.15)               | 0.5099         | 1.03(0.93,1.13)             | 0.6071         |
| Successful Repair              | Quartile 1 vs Q4  | 0.57(0.38,0.87)               | 0.0043         | 0.50(0.34,0.72)             | 0.0002         |
|                                | Quartile 2 vs. Q4 | 0.56(0.41,0.75)               | 0.0001         | 0.53(0.0,0.69)              | <.0001         |
|                                | Quartile 3 vs. Q4 | 0.62(0.49,0.80)               | 0.0002         | 0.59(0.47,0.73)             | <.0001         |
| <b>Surgeon Level Analysis</b>  | <b>Volume</b>     | <b>UNADJUSTED OR (95% CI)</b> | <b>P-value</b> | <b>ADJUSTED OR (95% CI)</b> | <b>P-value</b> |
| Operative Mortality            | Quartile 1 vs Q4  | 2.74(2.05,3.67)               | <.0001         | 2.25(1.68,3.01)             | <.0001         |
|                                | Quartile 2 vs. Q4 | 2.45(1.97,3.06)               | <.0001         | 2.18(1.76,2.71)             | <.0001         |
|                                | Quartile 3 vs. Q4 | 1.47(1.21,1.80)               | 0.0001         | 1.32(1.08,1.60)             | 0.0056         |
| Composite                      | Quartile 1 vs Q4  | 2.00(1.73,2.30)               | <.0001         | 1.72(1.50,1.98)             | <.0001         |
|                                | Quartile 2 vs. Q4 | 1.57(1.40,1.75)               | <.0001         | 1.40(1.26,1.55)             | <.0001         |
|                                | Quartile 3 vs. Q4 | 1.23(1.13,1.35)               | <.0001         | 1.13(1.03,1.23)             | 0.0065         |
| Successful Repair              | Quartile 1 vs Q4  | 0.59(0.43,0.83)               | 0.0021         | 0.62(0.45,0.85)             | 0.0029         |
|                                | Quartile 2 vs. Q4 | 0.65(0.51,0.82)               | 0.0004         | 0.65(0.52,0.81)             | 0.0002         |
|                                | Quartile 3 vs. Q4 | 0.82(0.68,0.99)               | 0.0424         | 0.79(0.66,0.94)             | 0.0084         |

**eTable 2. Patient and Procedural Characteristics of Patients Linked and Not Linked to CMS Claims Data**

| Variable                | Level                    | CMS-LINKED:NO<br>(N=9298) |       | CMS-LINKED:YES<br>(N=18204) |        | P-value+ |
|-------------------------|--------------------------|---------------------------|-------|-----------------------------|--------|----------|
| <b>Demographics/SES</b> |                          |                           |       |                             |        |          |
| Age                     | Median                   | 9298                      | 72.00 | 18204                       | 73.00  | <.0001   |
|                         | 25th                     |                           | 68.00 |                             | 69.00  |          |
|                         | 75th                     |                           | 77.00 |                             | 78.00  |          |
|                         | Mean                     |                           | 73.19 |                             | 73.88  |          |
|                         | STD                      |                           | 5.94  |                             | 6.17   |          |
|                         | Min                      |                           | 65.00 |                             | 65.00  |          |
|                         | Max                      |                           | 97.00 |                             | 100.00 |          |
|                         | Missing (%)              |                           | 0.00  |                             | 0.00   |          |
| Gender                  | Female                   | 4499                      | 48.39 | 9464                        | 51.99  | <.0001   |
|                         | Male                     | 4799                      | 51.61 | 8740                        | 48.01  |          |
| Race                    | Other                    | 147                       | 1.58  | 193                         | 1.06   | <.0001   |
|                         | Native American          | 11                        | 0.12  | 27                          | 0.15   |          |
|                         | Asian                    | 279                       | 3.00  | 309                         | 1.70   |          |
|                         | Hispanic                 | 432                       | 4.65  | 374                         | 2.05   |          |
|                         | Black                    | 577                       | 6.21  | 719                         | 3.95   |          |
|                         | Caucasian                | 7754                      | 83.39 | 16424                       | 90.22  |          |
|                         | Missing                  | 98                        | 1.05  | 158                         | 0.87   |          |
| Insurance               | NONE                     | 98                        | 1.05  | 24                          | 0.13   | <.0001   |
|                         | Government/Non US        | 121                       | 1.30  | 35                          | 0.19   |          |
|                         | Medicaid                 | 110                       | 1.18  | 12                          | 0.07   |          |
|                         | Medicare                 | 1493                      | 16.06 | 5500                        | 30.21  |          |
|                         | Private (HMO/Commercial) | 7385                      | 79.43 | 12401                       | 68.12  |          |



| Variable            | Level                  | CMS-LINKED:NO<br>(N=9298) |       | CMS-LINKED:YES<br>(N=18204) |       | P-value+ |
|---------------------|------------------------|---------------------------|-------|-----------------------------|-------|----------|
|                     | Missing                | 91                        | 0.98  | 232                         | 1.27  |          |
| BMI                 | Median                 | 9287                      | 26.08 | 18181                       | 25.92 | 0.0009   |
|                     | 25th                   |                           | 23.20 |                             | 23.10 |          |
|                     | 75th                   |                           | 29.70 |                             | 29.37 |          |
|                     | Mean                   |                           | 26.92 |                             | 26.71 |          |
|                     | STD                    |                           | 5.44  |                             | 5.51  |          |
|                     | Min                    |                           | 7.55  |                             | 7.34  |          |
|                     | Max                    |                           | 83.79 |                             | 97.40 |          |
|                     | Missing(%)             |                           | 0.12  |                             | 0.13  |          |
| BSA                 | Median                 | 9287                      | 1.87  | 18181                       | 1.86  | 0.0340   |
|                     | 25th                   |                           | 1.70  |                             | 1.69  |          |
|                     | 75th                   |                           | 2.04  |                             | 2.03  |          |
|                     | Mean                   |                           | 1.88  |                             | 1.87  |          |
|                     | STD                    |                           | 0.24  |                             | 0.24  |          |
|                     | Min                    |                           | 1.12  |                             | 1.02  |          |
|                     | Max                    |                           | 3.06  |                             | 3.11  |          |
|                     | Missing(%)             |                           | 0.12  |                             | 0.13  |          |
| <b>Risk Factors</b> |                        |                           |       |                             |       |          |
| Diabetes Mellitus   | Diabetes-Insulin       | 250                       | 2.69  | 489                         | 2.69  | 0.0090   |
|                     | Diabetes-No<br>Insulin | 1216                      | 13.08 | 2148                        | 11.80 |          |
|                     | No Diabetes            | 7828                      | 84.19 | 15561                       | 85.48 |          |
|                     | Missing                | 4                         | 0.04  | 6                           | 0.03  |          |
| Hypertension        | Yes                    | 6935                      | 74.59 | 13470                       | 73.99 | 0.2829   |
|                     | No                     | 2358                      | 25.36 | 4726                        | 25.96 |          |
|                     | Missing                | 5                         | 0.05  | 8                           | 0.04  |          |

| Variable             | Level                                | CMS-LINKED:NO<br>(N=9298) |       | CMS-LINKED:YES<br>(N=18204) |       | P-value+ |
|----------------------|--------------------------------------|---------------------------|-------|-----------------------------|-------|----------|
| Chronic Lung Disease | Lung Disease,<br>Unknown<br>Severity | 174                       | 1.87  | 299                         | 1.64  | 0.0220   |
|                      | Severe                               | 355                       | 3.82  | 665                         | 3.65  |          |
|                      | Moderate                             | 526                       | 5.66  | 893                         | 4.91  |          |
|                      | Mild                                 | 1080                      | 11.62 | 2052                        | 11.27 |          |
|                      | No                                   | 7109                      | 76.46 | 14188                       | 77.94 |          |
|                      | Missing                              | 54                        | 0.58  | 107                         | 0.59  |          |
| Dialysis             | Yes                                  | 66                        | 0.71  | 146                         | 0.80  | 0.4089   |
|                      | No                                   | 9227                      | 99.24 | 18051                       | 99.16 |          |
|                      | Missing                              | 5                         | 0.05  | 7                           | 0.04  |          |
| Last Creatinine      | Median                               | 9275                      | 1.00  | 18179                       | 1.00  | 0.7363   |
|                      | 25th                                 |                           | 0.80  |                             | 0.80  |          |
|                      | 75th                                 |                           | 1.20  |                             | 1.20  |          |
|                      | Mean                                 |                           | 1.04  |                             | 1.05  |          |
|                      | STD                                  |                           | 0.51  |                             | 0.52  |          |
|                      | Min                                  |                           | 0.20  |                             | 0.10  |          |
|                      | Max                                  |                           | 17.00 |                             | 12.70 |          |
|                      | Missing(%)                           |                           | 0.25  |                             | 0.14  |          |
| Smoking              | Current Smoker                       | 408                       | 4.39  | 706                         | 3.88  | <.0001   |
|                      | Past Smoker                          | 2234                      | 24.03 | 3975                        | 21.84 |          |
|                      | Never Smoker                         | 6634                      | 71.35 | 13491                       | 74.11 |          |
|                      | Missing                              | 22                        | 0.24  | 32                          | 0.18  |          |
| Immunocompromised    | Yes                                  | 251                       | 2.70  | 542                         | 2.98  | 0.1910   |
|                      | No                                   | 9028                      | 97.10 | 17618                       | 96.78 |          |
|                      | Missing                              | 19                        | 0.20  | 44                          | 0.24  |          |
| PVD                  | Yes                                  | 484                       | 5.21  | 966                         | 5.31  | 0.7291   |
|                      | No                                   | 8801                      | 94.65 | 17221                       | 94.60 |          |

| Variable                                  | Level        | CMS-LINKED:NO<br>(N=9298) |       | CMS-LINKED:YES<br>(N=18204) |       | P-value+ |
|-------------------------------------------|--------------|---------------------------|-------|-----------------------------|-------|----------|
|                                           | Missing      | 13                        | 0.14  | 17                          | 0.09  |          |
| CVD-CVA                                   | CVD - No CVA | 503                       | 5.41  | 1048                        | 5.76  | 0.4492   |
|                                           | CVD - CVA    | 454                       | 4.88  | 909                         | 4.99  |          |
|                                           | No CVD       | 8326                      | 89.55 | 16221                       | 89.11 |          |
|                                           | Missing      | 15                        | 0.16  | 26                          | 0.14  |          |
| <b><u>Hemodynamics/Cardiac Status</u></b> |              |                           |       |                             |       |          |
| Ejection Fraction*                        | Median       | 9158                      | 60.00 | 17849                       | 60.00 | 0.1096   |
|                                           | 25th         |                           | 53.00 |                             | 53.00 |          |
|                                           | 75th         |                           | 63.00 |                             | 63.00 |          |
|                                           | Mean         |                           | 56.80 |                             | 57.09 |          |
|                                           | STD          |                           | 10.12 |                             | 9.93  |          |
|                                           | Min          |                           | 5.00  |                             | 2.00  |          |
|                                           | Max          |                           | 86.00 |                             | 90.00 |          |
|                                           | Missing(%)   |                           | 1.51  |                             | 1.95  |          |
| Congestive HF within 2 weeks              | Yes          | 4782                      | 51.43 | 9009                        | 49.49 | 0.0011   |
|                                           | No           | 4469                      | 48.06 | 9151                        | 50.27 |          |
|                                           | Missing      | 47                        | 0.51  | 44                          | 0.24  |          |
| NYHA Class                                | IV           | 840                       | 17.57 | 1362                        | 15.12 | 0.0004   |
|                                           | III          | 2076                      | 43.41 | 3982                        | 44.20 |          |
|                                           | II           | 1470                      | 30.74 | 2955                        | 32.80 |          |
|                                           | I            | 313                       | 6.55  | 534                         | 5.93  |          |
|                                           | Missing      | 83                        | 1.74  | 176                         | 1.95  |          |
| <b><u>Mitral Disease Details</u></b>      |              |                           |       |                             |       |          |

| Variable                         | Level                 | CMS-LINKED:NO<br>(N=9298) |        | CMS-LINKED:YES<br>(N=18204) |        | P-value+ |
|----------------------------------|-----------------------|---------------------------|--------|-----------------------------|--------|----------|
| Mitral Valve Stenosis            | No                    | 9298                      | 100.00 | 18204                       | 100.00 | .        |
| Mitral Insufficiency             | Severe                | 8674                      | 93.29  | 16929                       | 93.00  | 0.3649   |
|                                  | Moderate to Severe    | 624                       | 6.71   | 1275                        | 7.00   |          |
| <b>Tricuspid Disease Details</b> |                       |                           |        |                             |        |          |
| Tricuspid Insufficiency          | N/A or Not Documented | 116                       | 1.25   | 216                         | 1.19   | 0.2124   |
|                                  | Severe                | 953                       | 10.25  | 1867                        | 10.26  |          |
|                                  | Moderate              | 2033                      | 21.86  | 4075                        | 22.39  |          |
|                                  | Mild                  | 2821                      | 30.34  | 5339                        | 29.33  |          |
|                                  | Trivial               | 1246                      | 13.40  | 2347                        | 12.89  |          |
|                                  | None                  | 2104                      | 22.63  | 4308                        | 23.67  |          |
|                                  | Missing               | 25                        | 0.27   | 52                          | 0.29   |          |
| <b>Operative</b>                 |                       |                           |        |                             |        |          |
| Operative Status                 | Urgent                | 1579                      | 16.98  | 2719                        | 14.94  | <.0001   |
|                                  | Elective              | 7719                      | 83.02  | 15485                       | 85.06  |          |

**eTable 3. Hospital 1-Year Death Time to Event Rates**

| <b>MVRR<br/>Volume<br/>Quartiles</b> | <b>t2</b> | <b>Unadjusted<br/>Failure<br/>Estimates<br/>(95% CI)</b> | <b>Adjusted<br/>Failure<br/>Estimates<br/>(95% CI)</b> |
|--------------------------------------|-----------|----------------------------------------------------------|--------------------------------------------------------|
| 1=Q1                                 | 30        | 0.0370 (0.0293, 0.0447)                                  | 0.0352 (0.028, 0.0423)                                 |
|                                      | 365       | 0.1026 (0.0831, 0.1217)                                  | 0.0958 (0.0786, 0.1127)                                |
|                                      | 730       | 0.1452 (0.1184, 0.1711)                                  | 0.1338 (0.1109, 0.1560)                                |
|                                      | 1095      | 0.1973 (0.1621, 0.2311)                                  | 0.1795 (0.1504, 0.2077)                                |
|                                      | 1420      | 0.2420 (0.1998, 0.2819)                                  | 0.2182 (0.1841, 0.2509)                                |
| 2=Q2                                 | 30        | 0.0292 (0.0248, 0.0337)                                  | 0.0263 (0.0224, 0.0303)                                |
|                                      | 365       | 0.0817 (0.0712, 0.0922)                                  | 0.0730 (0.0639, 0.0821)                                |
|                                      | 730       | 0.1162 (0.1018, 0.1304)                                  | 0.1030 (0.0908, 0.1151)                                |
|                                      | 1095      | 0.1590 (0.1398, 0.1777)                                  | 0.1399 (0.1241, 0.1555)                                |
|                                      | 1420      | 0.1960 (0.173, 0.2185)                                   | 0.1717 (0.1529, 0.1901)                                |
| 3=Q3                                 | 30        | 0.0241 (0.0211, 0.0271)                                  | 0.0239 (0.0209, 0.0268)                                |
|                                      | 365       | 0.0677 (0.061, 0.0743)                                   | 0.0665 (0.0603, 0.0728)                                |
|                                      | 730       | 0.0965 (0.0875, 0.1054)                                  | 0.0942 (0.0859, 0.1024)                                |
|                                      | 1095      | 0.1326 (0.1207, 0.1443)                                  | 0.1283 (0.1176, 0.1389)                                |
|                                      | 1420      | 0.1641 (0.1497, 0.1783)                                  | 0.1579 (0.1451, 0.1705)                                |
| 4=Q4                                 | 30        | 0.0220 (0.0198, 0.0241)                                  | 0.0222 (0.02, 0.0243)                                  |
|                                      | 365       | 0.0618 (0.0579, 0.0658)                                  | 0.0620 (0.0582, 0.0658)                                |
|                                      | 730       | 0.0883 (0.0833, 0.0934)                                  | 0.0880 (0.0832, 0.0927)                                |
|                                      | 1095      | 0.1216 (0.1151, 0.1280)                                  | 0.1202 (0.1142, 0.1262)                                |
|                                      | 1420      | 0.1507 (0.1429, 0.1585)                                  | 0.1482 (0.141, 0.1554)                                 |

**eTable 4. Hospital 1-Year Heart Failure Hospitalization Time to Event Rates**

| <b>MVRR<br/>Volume<br/>Quartile<br/>s</b> | <b>t2</b> | <b>Unadjusted<br/>HF Incidence<br/>Estimates<br/>(95% CI)</b> | <b>Adjusted<br/>HF Incidence<br/>Estimates<br/>(95% CI)</b> |
|-------------------------------------------|-----------|---------------------------------------------------------------|-------------------------------------------------------------|
| 1                                         | 30        | 0.0374 (0.0277, 0.0469)                                       | 0.0358 (0.0268, 0.0447)                                     |
|                                           | 365       | 0.0965 (0.073, 0.1194)                                        | 0.0924 (0.0713, 0.1130)                                     |
|                                           | 730       | 0.1221 (0.0928, 0.1504)                                       | 0.1171 (0.0912, 0.1422)                                     |
|                                           | 1095      | 0.1451 (0.1107, 0.1782)                                       | 0.1393 (0.1092, 0.1683)                                     |
|                                           | 1460      | 0.1667 (0.1275, 0.2042)                                       | 0.1600 (0.1261, 0.1925)                                     |
| 2                                         | 30        | 0.0416 (0.0352, 0.0480)                                       | 0.0359 (0.0304, 0.0413)                                     |
|                                           | 365       | 0.1072 (0.0928, 0.1213)                                       | 0.0926 (0.0807, 0.1043)                                     |
|                                           | 730       | 0.1353 (0.1176, 0.1527)                                       | 0.1173 (0.1028, 0.1316)                                     |
|                                           | 1095      | 0.1606 (0.1399, 0.1808)                                       | 0.1395 (0.1227, 0.1560)                                     |
|                                           | 1460      | 0.1843 (0.1608, 0.2072)                                       | 0.1603 (0.1413, 0.1789)                                     |
| 3                                         | 30        | 0.0313 (0.0273, 0.0353)                                       | 0.0303 (0.0265, 0.0340)                                     |
|                                           | 365       | 0.0813 (0.0727, 0.0898)                                       | 0.0791 (0.0712, 0.0869)                                     |
|                                           | 730       | 0.1030 (0.0925, 0.1135)                                       | 0.1006 (0.091, 0.1102)                                      |
|                                           | 1095      | 0.1227 (0.1103, 0.1349)                                       | 0.1202 (0.1089, 0.1313)                                     |
|                                           | 1460      | 0.1413 (0.1271, 0.1553)                                       | 0.1385 (0.1257, 0.1512)                                     |
| 4                                         | 30        | 0.0283 (0.0257, 0.0310)                                       | 0.0285 (0.0259, 0.0311)                                     |
|                                           | 365       | 0.0737 (0.069, 0.0784)                                        | 0.0747 (0.0702, 0.0792)                                     |
|                                           | 730       | 0.0936 (0.088, 0.0991)                                        | 0.0952 (0.0898, 0.1005)                                     |
|                                           | 1095      | 0.1116 (0.1051, 0.1181)                                       | 0.1138 (0.1076, 0.1200)                                     |
|                                           | 1460      | 0.1286 (0.121, 0.1362)                                        | 0.1313 (0.124, 0.1386)                                      |

**eTable 5. Hospital 1-Year Mitral Valve Reoperation Time to Event Rates**

| <b>MVRR Volume Quartiles</b> | <b>t2</b> | <b>Unadjusted HF Incidence Estimates (95% CI)</b> | <b>Adjusted HF Incidence Estimates (95% CI)</b> |
|------------------------------|-----------|---------------------------------------------------|-------------------------------------------------|
| 1                            | 30        | 0.0015 (0.0004, 0.0026)                           | 0.0015 (0.0003, 0.0026)                         |
|                              | 365       | 0.0147 (0.0059, 0.0234)                           | 0.0145 (0.0057, 0.0231)                         |
|                              | 730       | 0.0219 (0.0089, 0.0347)                           | 0.0215 (0.0087, 0.0342)                         |
|                              | 1095      | 0.0298 (0.0122, 0.0470)                           | 0.0291 (0.0118, 0.0460)                         |
|                              | 1460      | 0.0343 (0.0141, 0.0541)                           | 0.0334 (0.0136, 0.0528)                         |
| 2                            | 30        | 0.0011 (0.0004, 0.0017)                           | 0.0010 (0.0004, 0.0017)                         |
|                              | 365       | 0.0107 (0.0062, 0.0151)                           | 0.0102 (0.0059, 0.0144)                         |
|                              | 730       | 0.0159 (0.0095, 0.0224)                           | 0.0152 (0.009, 0.0213)                          |
|                              | 1095      | 0.0217 (0.013, 0.0303)                            | 0.0205 (0.0122, 0.0287)                         |
|                              | 1460      | 0.0250 (0.015, 0.0350)                            | 0.0236 (0.014, 0.0330)                          |
| 3                            | 30        | 0.0009 (0.0004, 0.0014)                           | 0.0009 (0.0004, 0.0013)                         |
|                              | 365       | 0.0086 (0.0059, 0.0113)                           | 0.0085 (0.0058, 0.0112)                         |
|                              | 730       | 0.0129 (0.009, 0.0168)                            | 0.0127 (0.0088, 0.0166)                         |
|                              | 1095      | 0.0176 (0.0123, 0.0228)                           | 0.0172 (0.012, 0.0223)                          |
|                              | 1460      | 0.0203 (0.0142, 0.0263)                           | 0.0198 (0.0138, 0.0257)                         |
| 4                            | 30        | 0.0010 (0.0005, 0.0015)                           | 0.0010 (0.0005, 0.0015)                         |
|                              | 365       | 0.0096 (0.0079, 0.0114)                           | 0.0098 (0.008, 0.0117)                          |
|                              | 730       | 0.0144 (0.012, 0.0168)                            | 0.0147 (0.0123, 0.0171)                         |
|                              | 1095      | 0.0196 (0.0166, 0.0227)                           | 0.0199 (0.0167, 0.0230)                         |
|                              | 1460      | 0.0226 (0.019, 0.0262)                            | 0.0228 (0.0191, 0.0265)                         |

**eTable 6. All Surgeon Mitral Valve Surgery Volume-Outcome Association Stratified by Volume Quartiles**

| Outcome variable    | Volume            | UNADJUSTED OR (95% CI) | P-value | ADJUSTED OR (95% CI) | P-value |
|---------------------|-------------------|------------------------|---------|----------------------|---------|
| Operative Mortality | Quartile 1 vs Q4  | 2.74(2.05,3.67)        | <.0001  | 2.25(1.68,3.01)      | <.0001  |
|                     | Quartile 2 vs. Q4 | 2.45(1.97,3.06)        | <.0001  | 2.18(1.76,2.71)      | <.0001  |
|                     | Quartile 3 vs. Q4 | 1.47(1.21,1.80)        | 0.0001  | 1.32(1.08,1.60)      | 0.0056  |
| Composite           | Quartile 1 vs Q4  | 2.00(1.73,2.30)        | <.0001  | 1.72(1.50,1.98)      | <.0001  |
|                     | Quartile 2 vs. Q4 | 1.57(1.40,1.75)        | <.0001  | 1.40(1.26,1.55)      | <.0001  |
|                     | Quartile 3 vs. Q4 | 1.23(1.13,1.35)        | <.0001  | 1.13(1.03,1.23)      | 0.0065  |
| REPAIR performed    | Quartile 1 vs Q4  | 0.29(0.25,0.34)        | <.0001  | 0.33(0.28,0.39)      | <.0001  |
|                     | Quartile 2 vs. Q4 | 0.40(0.35,0.46)        | <.0001  | 0.43(0.37,0.49)      | <.0001  |
|                     | Quartile 3 vs. Q4 | 0.55(0.49,0.62)        | <.0001  | 0.59(0.53,0.67)      | <.0001  |
| REPAIR Success      | Quartile 1 vs Q4  | 0.59(0.43,0.83)        | 0.0021  | 0.62(0.45,0.85)      | 0.0029  |
|                     | Quartile 2 vs. Q4 | 0.65(0.51,0.82)        | 0.0004  | 0.65(0.52,0.81)      | 0.0002  |
|                     | Quartile 3 vs. Q4 | 0.82(0.68,0.99)        | 0.0424  | 0.79(0.66,0.94)      | 0.0084  |
| REPAIR Attempted    | Quartile 1 vs Q4  | 0.31(0.26,0.36)        | <.0001  | 0.34(0.29,0.41)      | <.0001  |
|                     | Quartile 2 vs. Q4 | 0.40(0.35,0.46)        | <.0001  | 0.43(0.37,0.50)      | <.0001  |
|                     | Quartile 3 vs. Q4 | 0.56(0.50,0.64)        | <.0001  | 0.61(0.54,0.70)      | <.0001  |



**eTable 7. Experienced Surgeons Mitral Valve Surgery Volume-Outcome Association Stratified by Volume Quartiles**

| Outcome variable    | Volume            | UNADJUSTED OR (95% CI) | P-value | ADJUSTED OR (95% CI) | P-value |
|---------------------|-------------------|------------------------|---------|----------------------|---------|
| Operative Mortality | Quartile 1 vs Q4  | 2.82(2.10,3.80)        | <.0001  | 2.30(1.71,3.10)      | <.0001  |
|                     | Quartile 2 vs. Q4 | 2.23(1.77,2.80)        | <.0001  | 1.98(1.58,2.48)      | <.0001  |
|                     | Quartile 3 vs. Q4 | 1.42(1.16,1.74)        | 0.0009  | 1.26(1.03,1.54)      | 0.0246  |
| Composite           | Quartile 1 vs Q4  | 1.98(1.71,2.29)        | <.0001  | 1.68(1.45,1.94)      | <.0001  |
|                     | Quartile 2 vs. Q4 | 1.51(1.35,1.69)        | <.0001  | 1.35(1.21,1.50)      | <.0001  |
|                     | Quartile 3 vs. Q4 | 1.24(1.12,1.36)        | <.0001  | 1.12(1.03,1.23)      | 0.0112  |
| REPAIR performed    | Quartile 1 vs Q4  | 0.26(0.22,0.31)        | <.0001  | 0.31(0.26,0.36)      | <.0001  |
|                     | Quartile 2 vs. Q4 | 0.36(0.31,0.41)        | <.0001  | 0.39(0.34,0.45)      | <.0001  |
|                     | Quartile 3 vs. Q4 | 0.50(0.44,0.57)        | <.0001  | 0.55(0.49,0.63)      | <.0001  |
| REPAIR Success      | Quartile 1 vs Q4  | 0.56(0.38,0.82)        | 0.0034  | 0.60(0.42,0.86)      | 0.0061  |
|                     | Quartile 2 vs. Q4 | 0.67(0.52,0.86)        | 0.0019  | 0.67(0.53,0.85)      | 0.0008  |
|                     | Quartile 3 vs. Q4 | 0.86(0.70,1.06)        | 0.1534  | 0.84(0.69,1.01)      | 0.0644  |
| REPAIR Attempted    | Quartile 1 vs Q4  | 0.28(0.23,0.33)        | <.0001  | 0.31(0.26,0.37)      | <.0001  |
|                     | Quartile 2 vs. Q4 | 0.38(0.33,0.44)        | <.0001  | 0.41(0.35,0.48)      | <.0001  |
|                     | Quartile 3 vs. Q4 | 0.51(0.44,0.58)        | <.0001  | 0.56(0.48,0.64)      | <.0001  |

**eTable 8. All Surgeon 1-Year Mortality Time to Event Rates**

| MVRR Volume Quartiles | t2   | Unadjusted Survival Estimates (95% CI) | Adjusted Survival Estimates (95% CI) | Unadjusted Failure Estimates (95% CI) | Adjusted Failure Estimates (95% CI) |
|-----------------------|------|----------------------------------------|--------------------------------------|---------------------------------------|-------------------------------------|
| 1=Q1                  | 30   | 0.9638 (0.9569, 0.9708)                | 0.9657 (0.9592, 0.9722)              | 0.0362 (0.0292, 0.0431)               | 0.0343 (0.0278, 0.0408)             |
|                       | 365  | 0.8995 (0.8825, 0.9169)                | 0.9063 (0.8912, 0.9216)              | 0.1005 (0.0831, 0.1175)               | 0.0937 (0.0784, 0.1088)             |
|                       | 730  | 0.8578 (0.8346, 0.8816)                | 0.8691 (0.8492, 0.8894)              | 0.1422 (0.1184, 0.1654)               | 0.1309 (0.1106, 0.1508)             |
|                       | 1095 | 0.8067 (0.7766, 0.8379)                | 0.8242 (0.799, 0.8501)               | 0.1933 (0.1621, 0.2234)               | 0.1758 (0.1499, 0.2010)             |
|                       | 1420 | 0.7630 (0.7274, 0.8003)                | 0.7863 (0.7571, 0.8166)              | 0.2370 (0.1997, 0.2726)               | 0.2137 (0.1834, 0.2429)             |
| 2=Q2                  | 30   | 0.9684 (0.9637, 0.9732)                | 0.9715 (0.9672, 0.9757)              | 0.0316 (0.0268, 0.0363)               | 0.0285 (0.0243, 0.0328)             |
|                       | 365  | 0.9119 (0.9008, 0.9231)                | 0.9212 (0.9116, 0.9308)              | 0.0881 (0.0769, 0.0992)               | 0.0788 (0.0692, 0.0884)             |
|                       | 730  | 0.8749 (0.8598, 0.8902)                | 0.8891 (0.8764, 0.9020)              | 0.1251 (0.1098, 0.1402)               | 0.1109 (0.098, 0.1236)              |
|                       | 1095 | 0.8293 (0.8097, 0.8495)                | 0.8499 (0.8337, 0.8665)              | 0.1707 (0.1505, 0.1903)               | 0.1501 (0.1335, 0.1663)             |
|                       | 1420 | 0.7901 (0.7666, 0.8143)                | 0.8164 (0.7973, 0.8360)              | 0.2099 (0.1857, 0.2334)               | 0.1836 (0.164, 0.2027)              |
| 3=Q3                  | 30   | 0.9746 (0.9714, 0.9779)                | 0.9758 (0.9727, 0.9789)              | 0.0254 (0.0221, 0.0286)               | 0.0242 (0.0211, 0.0273)             |
|                       | 365  | 0.9288 (0.9215, 0.9361)                | 0.9326 (0.9259, 0.9392)              | 0.0712 (0.0639, 0.0785)               | 0.0674 (0.0608, 0.0741)             |
|                       | 730  | 0.8985 (0.8886, 0.9084)                | 0.9046 (0.8958, 0.9134)              | 0.1015 (0.0916, 0.1114)               | 0.0954 (0.0866, 0.1042)             |
|                       | 1095 | 0.8608 (0.8478, 0.8739)                | 0.8701 (0.8588, 0.8815)              | 0.1392 (0.1261, 0.1522)               | 0.1299 (0.1185, 0.1412)             |
|                       | 1420 | 0.8279 (0.8123, 0.8439)                | 0.8403 (0.8269, 0.8540)              | 0.1721 (0.1561, 0.1877)               | 0.1597 (0.146, 0.1731)              |
| 4=Q4                  | 30   | 0.9785 (0.9764, 0.9807)                | 0.9782 (0.9761, 0.9803)              | 0.0215 (0.0193, 0.0236)               | 0.0218 (0.0197, 0.0239)             |
|                       | 365  | 0.9396 (0.9357, 0.9434)                | 0.9389 (0.9352, 0.9426)              | 0.0604 (0.0566, 0.0643)               | 0.0611 (0.0574, 0.0648)             |
|                       | 730  | 0.9136 (0.9087, 0.9185)                | 0.9133 (0.9087, 0.9180)              | 0.0864 (0.0815, 0.0913)               | 0.0867 (0.082, 0.0913)              |
|                       | 1095 | 0.8812 (0.8749, 0.8874)                | 0.8815 (0.8757, 0.8874)              | 0.1188 (0.1126, 0.1251)               | 0.1185 (0.1126, 0.1243)             |
|                       | 1420 | 0.8527 (0.8451, 0.8604)                | 0.8540 (0.8469, 0.8611)              | 0.1473 (0.1396, 0.1549)               | 0.1460 (0.1389, 0.1531)             |

**eTable 9. All Surgeon 1-Year HF Hospitalization Rates**

| <b>MVRR<br/>Volume<br/>Quartile<br/>s</b> |      | <b>Raw CIF Estimates<br/>(95% CI) –same as in page<br/>t2 33</b> | <b>KM estimates (HF<br/>Incidence estimate as 1-<br/>KM Survival)</b> | <b>Unadjusted<br/>HF Incidence<br/>Estimates<br/>(95% CI)</b> | <b>Adjusted<br/>HF Incidence<br/>Estimates<br/>(95% CI)</b> |
|-------------------------------------------|------|------------------------------------------------------------------|-----------------------------------------------------------------------|---------------------------------------------------------------|-------------------------------------------------------------|
| 1                                         | 30   | 0.0415 (0.0273, 0.0600)                                          | 0.0420 (0.0283, 0.0620)                                               | 0.0355 (0.027, 0.0440)                                        | 0.0337 (0.0258, 0.0416)                                     |
|                                           | 365  | 0.0875 (0.0659, 0.1129)                                          | 0.0902 (0.0688, 0.1176)                                               | 0.0919 (0.0711, 0.1123)                                       | 0.0873 (0.0688, 0.1056)                                     |
|                                           | 730  | 0.1093 (0.0842, 0.1379)                                          | 0.1141 (0.0890, 0.1458)                                               | 0.1164 (0.0904, 0.1416)                                       | 0.1108 (0.0879, 0.1331)                                     |
|                                           | 1095 | 0.1277 (0.0994, 0.1597)                                          | 0.1352 (0.1063, 0.1712)                                               | 0.1384 (0.1079, 0.1679)                                       | 0.1320 (0.1054, 0.1579)                                     |
|                                           | 1460 | 0.1474 (0.1153, 0.1832)                                          | 0.1584 (0.1249, 0.1998)                                               | 0.1592 (0.1244, 0.1926)                                       | 0.1518 (0.1218, 0.1808)                                     |
| 2                                         | 30   | 0.0432 (0.0331, 0.0552)                                          | 0.0436 (0.0337, 0.0562)                                               | 0.0398 (0.0334, 0.0462)                                       | 0.0367 (0.0309, 0.0424)                                     |
|                                           | 365  | 0.1027 (0.0866, 0.1204)                                          | 0.1048 (0.0888, 0.1234)                                               | 0.1027 (0.0881, 0.1171)                                       | 0.0945 (0.0819, 0.1070)                                     |
|                                           | 730  | 0.1238 (0.1056, 0.1434)                                          | 0.1273 (0.1091, 0.1481)                                               | 0.1298 (0.1118, 0.1475)                                       | 0.1196 (0.1042, 0.1348)                                     |
|                                           | 1095 | 0.1470 (0.1263, 0.1691)                                          | 0.1528 (0.1318, 0.1767)                                               | 0.1542 (0.1331, 0.1748)                                       | 0.1422 (0.1244, 0.1598)                                     |
|                                           | 1460 | 0.1712 (0.1468, 0.1971)                                          | 0.1803 (0.1550, 0.2092)                                               | 0.1770 (0.153, 0.2003)                                        | 0.1633 (0.1431, 0.1829)                                     |
| 3                                         | 30   | 0.0362 (0.0297, 0.0436)                                          | 0.0364 (0.0300, 0.0441)                                               | 0.0338 (0.0294, 0.0381)                                       | 0.0305 (0.0266, 0.0344)                                     |
|                                           | 365  | 0.0882 (0.0778, 0.0994)                                          | 0.0899 (0.0796, 0.1016)                                               | 0.0875 (0.078, 0.0969)                                        | 0.0796 (0.0714, 0.0877)                                     |
|                                           | 730  | 0.1112 (0.0991, 0.1240)                                          | 0.1143 (0.1021, 0.1278)                                               | 0.1109 (0.0992, 0.1224)                                       | 0.1012 (0.0912, 0.1112)                                     |
|                                           | 1095 | 0.1282 (0.1147, 0.1425)                                          | 0.1327 (0.1189, 0.1479)                                               | 0.1319 (0.1182, 0.1454)                                       | 0.1209 (0.1092, 0.1324)                                     |
|                                           | 1460 | 0.1411 (0.1258, 0.1573)                                          | 0.1454 (0.1299, 0.1626)                                               | 0.1518 (0.136, 0.1672)                                        | 0.1393 (0.1259, 0.1524)                                     |
| 4                                         | 30   | 0.0267 (0.0239, 0.0298)                                          | 0.0268 (0.0241, 0.0299)                                               | 0.0282 (0.0256, 0.0308)                                       | 0.0286 (0.026, 0.0311)                                      |
|                                           | 365  | 0.0717 (0.0670, 0.0765)                                          | 0.0726 (0.0680, 0.0776)                                               | 0.0733 (0.0687, 0.0779)                                       | 0.0748 (0.0703, 0.0792)                                     |
|                                           | 730  | 0.0909 (0.0855, 0.0965)                                          | 0.0927 (0.0872, 0.0985)                                               | 0.0931 (0.0876, 0.0986)                                       | 0.0953 (0.09, 0.1006)                                       |
|                                           | 1095 | 0.1081 (0.1019, 0.1146)                                          | 0.1112 (0.1048, 0.1179)                                               | 0.1110 (0.1047, 0.1174)                                       | 0.1139 (0.1078, 0.1201)                                     |
|                                           | 1460 | 0.1241 (0.1168, 0.1316)                                          | 0.1263 (0.1189, 0.1341)                                               | 0.1280 (0.1205, 0.1354)                                       | 0.1314 (0.1242, 0.1386)                                     |

**eTable 10. All Surgeon 1-Year MV Reoperation Time to Event Rates**

| MVRR Volume Quartiles | t2   | Raw CIF Estimates (95% CI) –same as seen above | KM estimates (MV REOPERATION Incidence estimate as 1-KM Survival) | Unadjusted MV REOPERATION Incidence Estimates (95% CI) | Adjusted MV REOPERATION Incidence Estimates (95% CI) |
|-----------------------|------|------------------------------------------------|-------------------------------------------------------------------|--------------------------------------------------------|------------------------------------------------------|
| 1                     | 30   | 0.0035 (0.0007, 0.0118)                        | 0.0035 (0.0009, 0.0140)                                           | 0.0011 (0.0002, 0.0020)                                | 0.0011 (0.0002, 0.0019)                              |
|                       | 365  | 0.0128 (0.0057, 0.0252)                        | 0.0133 (0.0064, 0.0278)                                           | 0.0109 (0.004, 0.0177)                                 | 0.0107 (0.004, 0.0175)                               |
|                       | 730  | 0.0175 (0.0086, 0.0319)                        | 0.0185 (0.0096, 0.0355)                                           | 0.0163 (0.0061, 0.0263)                                | 0.0160 (0.006, 0.0259)                               |
|                       | 1095 | 0.0175 (0.0086, 0.0319)                        | 0.0185 (0.0096, 0.0355)                                           | 0.0221 (0.0084, 0.0356)                                | 0.0216 (0.0082, 0.0349)                              |
|                       | 1460 | 0.0222 (0.0108, 0.0408)                        | 0.0244 (0.0123, 0.0481)                                           | 0.0255 (0.0097, 0.0410)                                | 0.0249 (0.0094, 0.0400)                              |
| 2                     | 30   | 0.0023 (0.0007, 0.0065)                        | 0.0024 (0.0008, 0.0073)                                           | 0.0012 (0.0005, 0.0019)                                | 0.0012 (0.0004, 0.0019)                              |
|                       | 365  | 0.0107 (0.0060, 0.0179)                        | 0.0111 (0.0064, 0.0190)                                           | 0.0119 (0.0071, 0.0167)                                | 0.0115 (0.0068, 0.0162)                              |
|                       | 730  | 0.0182 (0.0114, 0.0275)                        | 0.0192 (0.0123, 0.0298)                                           | 0.0178 (0.0107, 0.0248)                                | 0.0171 (0.0103, 0.0239)                              |
|                       | 1095 | 0.0219 (0.0142, 0.0323)                        | 0.0234 (0.0155, 0.0353)                                           | 0.0242 (0.0147, 0.0336)                                | 0.0231 (0.014, 0.0322)                               |
|                       | 1460 | 0.0264 (0.0170, 0.0391)                        | 0.0256 (0.0169, 0.0386)                                           | 0.0279 (0.0169, 0.0387)                                | 0.0266 (0.0161, 0.0370)                              |
| 3                     | 30   | 0.0000 (0.0000, 0.0000)                        | 0.0000 (0.0000, 0.0000)                                           | 0.0010 (0.0004, 0.0016)                                | 0.0010 (0.0004, 0.0016)                              |
|                       | 365  | 0.0090 (0.0059, 0.0133)                        | 0.0093 (0.0062, 0.0141)                                           | 0.0099 (0.0067, 0.0130)                                | 0.0099 (0.0068, 0.0131)                              |
|                       | 730  | 0.0136 (0.0095, 0.0191)                        | 0.0143 (0.0101, 0.0203)                                           | 0.0148 (0.0102, 0.0192)                                | 0.0148 (0.0102, 0.0193)                              |
|                       | 1095 | 0.0191 (0.0137, 0.0259)                        | 0.0204 (0.0148, 0.0281)                                           | 0.0201 (0.014, 0.0261)                                 | 0.0200 (0.0139, 0.0260)                              |
|                       | 1460 | 0.0211 (0.0152, 0.0285)                        | 0.0226 (0.0164, 0.0311)                                           | 0.0231 (0.0161, 0.0301)                                | 0.0230 (0.016, 0.0299)                               |
| 4                     | 30   | 0.0009 (0.0005, 0.0016)                        | 0.0009 (0.0005, 0.0017)                                           | 0.0009 (0.0005, 0.0014)                                | 0.0010 (0.0005, 0.0014)                              |
|                       | 365  | 0.0092 (0.0075, 0.0111)                        | 0.0094 (0.0077, 0.0115)                                           | 0.0093 (0.0076, 0.0110)                                | 0.0095 (0.0077, 0.0112)                              |
|                       | 730  | 0.0133 (0.0112, 0.0157)                        | 0.0138 (0.0116, 0.0164)                                           | 0.0139 (0.0117, 0.0162)                                | 0.0141 (0.0118, 0.0164)                              |
|                       | 1095 | 0.0182 (0.0155, 0.0213)                        | 0.0192 (0.0164, 0.0226)                                           | 0.0190 (0.016, 0.0219)                                 | 0.0191 (0.0161, 0.0221)                              |
|                       | 1460 | 0.0206 (0.0175, 0.0241)                        | 0.0211 (0.0179, 0.0248)                                           | 0.0219 (0.0184, 0.0253)                                | 0.0219 (0.0184, 0.0254)                              |

**eTable 11. Experienced Surgeons 1-Year Mortality Time to Event Rates**

| MVRR Volume Quartiles | t2   | Unadjusted Survival Estimates (95% CI) | Adjusted Survival Estimates (95% CI) | Unadjusted Failure Estimates (95% CI) | Adjusted Failure Estimates (95% CI) |
|-----------------------|------|----------------------------------------|--------------------------------------|---------------------------------------|-------------------------------------|
| 1=Q1                  | 30   | 0.9631 (0.9558, 0.9703)                | 0.9653 (0.9586, 0.9720)              | 0.0369 (0.0297, 0.0442)               | 0.0347 (0.028, 0.0414)              |
|                       | 365  | 0.8981 (0.8804, 0.9160)                | 0.9058 (0.8904, 0.9216)              | 0.1019 (0.084, 0.1196)                | 0.0942 (0.0784, 0.1096)             |
|                       | 730  | 0.8547 (0.8307, 0.8795)                | 0.8675 (0.847, 0.8885)               | 0.1453 (0.1205, 0.1693)               | 0.1325 (0.1115, 0.1530)             |
|                       | 1095 | 0.8016 (0.7702, 0.8342)                | 0.8211 (0.7951, 0.8480)              | 0.1984 (0.1658, 0.2298)               | 0.1789 (0.152, 0.2049)              |
|                       | 1420 | 0.7564 (0.7193, 0.7955)                | 0.7822 (0.7521, 0.8136)              | 0.2436 (0.2045, 0.2807)               | 0.2178 (0.1864, 0.2479)             |
| 2=Q2                  | 30   | 0.9692 (0.9645, 0.9739)                | 0.9715 (0.9672, 0.9758)              | 0.0308 (0.0261, 0.0355)               | 0.0285 (0.0242, 0.0328)             |
|                       | 365  | 0.9144 (0.9034, 0.9256)                | 0.9218 (0.9121, 0.9316)              | 0.0856 (0.0744, 0.0966)               | 0.0782 (0.0684, 0.0879)             |
|                       | 730  | 0.8776 (0.8626, 0.8929)                | 0.8892 (0.8763, 0.9023)              | 0.1224 (0.1071, 0.1374)               | 0.1108 (0.0977, 0.1237)             |
|                       | 1095 | 0.8319 (0.8122, 0.8522)                | 0.8491 (0.8325, 0.8660)              | 0.1681 (0.1478, 0.1878)               | 0.1509 (0.134, 0.1675)              |
|                       | 1420 | 0.7928 (0.7692, 0.8171)                | 0.8150 (0.7956, 0.8350)              | 0.2072 (0.1829, 0.2308)               | 0.1850 (0.165, 0.2044)              |
| 3=Q3                  | 30   | 0.9759 (0.9727, 0.9790)                | 0.9770 (0.974, 0.9800)               | 0.0241 (0.021, 0.0273)                | 0.0230 (0.02, 0.0260)               |
|                       | 365  | 0.9326 (0.9255, 0.9397)                | 0.9360 (0.9296, 0.9425)              | 0.0674 (0.0603, 0.0745)               | 0.0640 (0.0575, 0.0704)             |
|                       | 730  | 0.9031 (0.8935, 0.9128)                | 0.9087 (0.9001, 0.9174)              | 0.0969 (0.0872, 0.1065)               | 0.0913 (0.0826, 0.0999)             |
|                       | 1095 | 0.8662 (0.8535, 0.8791)                | 0.8746 (0.8635, 0.8859)              | 0.1338 (0.1209, 0.1465)               | 0.1254 (0.1141, 0.1365)             |
|                       | 1420 | 0.8342 (0.8187, 0.8499)                | 0.8454 (0.832, 0.8589)               | 0.1658 (0.1501, 0.1813)               | 0.1546 (0.1411, 0.1680)             |
| 4=Q4                  | 30   | 0.9785 (0.9763, 0.9807)                | 0.9782 (0.9761, 0.9804)              | 0.0215 (0.0193, 0.0237)               | 0.0218 (0.0196, 0.0239)             |
|                       | 365  | 0.9399 (0.9359, 0.9439)                | 0.9394 (0.9356, 0.9433)              | 0.0601 (0.0561, 0.0641)               | 0.0606 (0.0567, 0.0644)             |
|                       | 730  | 0.9135 (0.9084, 0.9186)                | 0.9134 (0.9085, 0.9182)              | 0.0865 (0.0814, 0.0916)               | 0.0866 (0.0818, 0.0915)             |
|                       | 1095 | 0.8803 (0.8737, 0.8868)                | 0.8809 (0.8747, 0.8870)              | 0.1197 (0.1132, 0.1263)               | 0.1191 (0.113, 0.1253)              |
|                       | 1420 | 0.8513 (0.8434, 0.8594)                | 0.8528 (0.8454, 0.8603)              | 0.1487 (0.1406, 0.1566)               | 0.1472 (0.1397, 0.1546)             |

**eTable 12. Experienced Surgeon 1-Year HF Hospitalization Time to Event Rates**

| MVRV Volume<br>Quartiles | t2   | REPAIRS                                  |                                        | REPLACEMENTS                             |                                        |
|--------------------------|------|------------------------------------------|----------------------------------------|------------------------------------------|----------------------------------------|
|                          |      | Unadjusted Risk<br>Estimates<br>(95% CI) | Adjusted Risk<br>Estimates<br>(95% CI) | Unadjusted Risk<br>Estimates<br>(95% CI) | Adjusted Risk<br>Estimates<br>(95% CI) |
| 1=Q1                     | 30   | 0.0314 (0.0208, 0.0419)                  | 0.0288 (0.0192, 0.0382)                | 0.0432 (0.0279, 0.0582)                  | 0.0469 (0.0306, 0.0630)                |
|                          | 365  | 0.0835 (0.0568, 0.1095)                  | 0.0764 (0.0533, 0.0988)                | 0.1114 (0.0749, 0.1464)                  | 0.1214 (0.0837, 0.1576)                |
|                          | 730  | 0.1078 (0.0737, 0.1406)                  | 0.0985 (0.0697, 0.1265)                | 0.1391 (0.0943, 0.1817)                  | 0.1523 (0.1064, 0.1958)                |
|                          | 1095 | 0.1292 (0.0888, 0.1678)                  | 0.1179 (0.0841, 0.1504)                | 0.1634 (0.1114, 0.2124)                  | 0.1800 (0.1271, 0.2297)                |
|                          | 1420 | 0.1506 (0.1039, 0.1948)                  | 0.1370 (0.0985, 0.1738)                | 0.1845 (0.1261, 0.2389)                  | 0.2040 (0.145, 0.2589)                 |
| 2=Q2                     | 30   | 0.0298 (0.0228, 0.0367)                  | 0.0262 (0.0202, 0.0322)                | 0.0461 (0.0349, 0.0572)                  | 0.0501 (0.0381, 0.0620)                |
|                          | 365  | 0.0794 (0.0625, 0.0959)                  | 0.0700 (0.0559, 0.0839)                | 0.1186 (0.0937, 0.1428)                  | 0.1290 (0.1032, 0.1541)                |
|                          | 730  | 0.1025 (0.0811, 0.1234)                  | 0.0906 (0.0729, 0.1079)                | 0.1480 (0.1177, 0.1772)                  | 0.1615 (0.1305, 0.1914)                |
|                          | 1095 | 0.1229 (0.0976, 0.1475)                  | 0.1086 (0.0879, 0.1288)                | 0.1737 (0.1388, 0.2072)                  | 0.1906 (0.155, 0.2246)                 |
|                          | 1420 | 0.1434 (0.1141, 0.1717)                  | 0.1264 (0.1027, 0.1494)                | 0.1959 (0.1567, 0.2332)                  | 0.2157 (0.1761, 0.2533)                |
| 3=Q3                     | 30   | 0.0294 (0.0244, 0.0343)                  | 0.0260 (0.0217, 0.0304)                | 0.0473 (0.0378, 0.0566)                  | 0.0513 (0.0413, 0.0611)                |
|                          | 365  | 0.0783 (0.0674, 0.0891)                  | 0.0695 (0.0602, 0.0787)                | 0.1214 (0.1019, 0.1406)                  | 0.1317 (0.1117, 0.1513)                |
|                          | 730  | 0.1012 (0.0875, 0.1147)                  | 0.0900 (0.0785, 0.1013)                | 0.1515 (0.1278, 0.1745)                  | 0.1647 (0.1409, 0.1880)                |
|                          | 1095 | 0.1214 (0.1052, 0.1373)                  | 0.1079 (0.0944, 0.1212)                | 0.1777 (0.1505, 0.2042)                  | 0.1943 (0.1668, 0.2208)                |
|                          | 1420 | 0.1416 (0.1227, 0.1600)                  | 0.1256 (0.1101, 0.1408)                | 0.2004 (0.1696, 0.2300)                  | 0.2197 (0.1889, 0.2494)                |
| 4=Q4                     | 30   | 0.0222 (0.0195, 0.0249)                  | 0.0223 (0.0196, 0.0250)                | 0.0486 (0.041, 0.0562)                   | 0.0458 (0.0388, 0.0529)                |
|                          | 365  | 0.0595 (0.0546, 0.0643)                  | 0.0601 (0.0554, 0.0647)                | 0.1249 (0.1112, 0.1383)                  | 0.1188 (0.1063, 0.1312)                |
|                          | 730  | 0.0771 (0.0712, 0.0829)                  | 0.0780 (0.0724, 0.0836)                | 0.1557 (0.1395, 0.1715)                  | 0.1491 (0.1343, 0.1637)                |
|                          | 1095 | 0.0927 (0.0858, 0.0996)                  | 0.0939 (0.0873, 0.1004)                | 0.1826 (0.164, 0.2007)                   | 0.1764 (0.1592, 0.1932)                |
|                          | 1420 | 0.1084 (0.1002, 0.1166)                  | 0.1096 (0.1018, 0.1173)                | 0.2058 (0.1845, 0.2265)                  | 0.2000 (0.1801, 0.2194)                |

**eTable 13. Experienced Surgeons 1-Year MV Reoperation Time to Event Rates**

| MVRR Volume Quartiles | t2   | Raw CIF Estimates (95% CI) –same as seem above | KM estimates (MV REOPERATION Incidence estimate as 1-KM Survival) | Unadjusted MV REOPERATION Incidence Estimates (95% CI) | Adjusted MV REOPERATION Incidence Estimates (95% CI) |
|-----------------------|------|------------------------------------------------|-------------------------------------------------------------------|--------------------------------------------------------|------------------------------------------------------|
| 1                     | 30   | 0.0037 (0.0008, 0.0125)                        | 0.0037 (0.0009, 0.0149)                                           | 0.0013 (0.0003, 0.0022)                                | 0.0013 (0.0003, 0.0022)                              |
|                       | 365  | 0.0112 (0.0047, 0.0232)                        | 0.0115 (0.0052, 0.0254)                                           | 0.0125 (0.005, 0.0199)                                 | 0.0124 (0.0049, 0.0198)                              |
|                       | 730  | 0.0160 (0.0075, 0.0302)                        | 0.0169 (0.0084, 0.0337)                                           | 0.0188 (0.0076, 0.0299)                                | 0.0186 (0.0075, 0.0296)                              |
|                       | 1095 | 0.0216 (0.0110, 0.0384)                        | 0.0234 (0.0124, 0.0439)                                           | 0.0259 (0.0106, 0.0409)                                | 0.0254 (0.0103, 0.0402)                              |
|                       | 1460 | 0.0266 (0.0135, 0.0473)                        | 0.0297 (0.0155, 0.0563)                                           | 0.0297 (0.0122, 0.0468)                                | 0.0291 (0.0119, 0.0460)                              |
| 2                     | 30   | 0.0024 (0.0007, 0.0066)                        | 0.0024 (0.0008, 0.0074)                                           | 0.0012 (0.0004, 0.0019)                                | 0.0011 (0.0004, 0.0018)                              |
|                       | 365  | 0.0110 (0.0062, 0.0183)                        | 0.0114 (0.0066, 0.0196)                                           | 0.0115 (0.0067, 0.0162)                                | 0.0111 (0.0065, 0.0157)                              |
|                       | 730  | 0.0186 (0.0117, 0.0282)                        | 0.0197 (0.0127, 0.0305)                                           | 0.0173 (0.0103, 0.0243)                                | 0.0167 (0.0099, 0.0235)                              |
|                       | 1095 | 0.0212 (0.0136, 0.0316)                        | 0.0227 (0.0148, 0.0345)                                           | 0.0238 (0.0142, 0.0332)                                | 0.0228 (0.0136, 0.0319)                              |
|                       | 1460 | 0.0257 (0.0164, 0.0384)                        | 0.0249 (0.0163, 0.0379)                                           | 0.0273 (0.0163, 0.0381)                                | 0.0261 (0.0156, 0.0365)                              |
| 3                     | 30   | 0.0004 (0.0000, 0.0020)                        | 0.0004 (0.0001, 0.0025)                                           | 0.0010 (0.0004, 0.0016)                                | 0.0010 (0.0004, 0.0016)                              |
|                       | 365  | 0.0102 (0.0068, 0.0147)                        | 0.0105 (0.0072, 0.0155)                                           | 0.0099 (0.0068, 0.0130)                                | 0.0098 (0.0067, 0.0129)                              |
|                       | 730  | 0.0143 (0.0101, 0.0198)                        | 0.0150 (0.0107, 0.0210)                                           | 0.0149 (0.0104, 0.0194)                                | 0.0147 (0.0102, 0.0192)                              |
|                       | 1095 | 0.0189 (0.0137, 0.0256)                        | 0.0200 (0.0146, 0.0274)                                           | 0.0205 (0.0144, 0.0266)                                | 0.0201 (0.0141, 0.0261)                              |
|                       | 1460 | 0.0209 (0.0151, 0.0281)                        | 0.0222 (0.0162, 0.0304)                                           | 0.0235 (0.0165, 0.0305)                                | 0.0230 (0.0161, 0.0299)                              |
| 4                     | 30   | 0.0008 (0.0004, 0.0015)                        | 0.0008 (0.0004, 0.0016)                                           | 0.0009 (0.0005, 0.0014)                                | 0.0009 (0.0005, 0.0014)                              |
|                       | 365  | 0.0088 (0.0072, 0.0109)                        | 0.0091 (0.0074, 0.0112)                                           | 0.0092 (0.0074, 0.0110)                                | 0.0093 (0.0075, 0.0111)                              |
|                       | 730  | 0.0132 (0.0110, 0.0157)                        | 0.0137 (0.0115, 0.0164)                                           | 0.0139 (0.0115, 0.0163)                                | 0.0140 (0.0116, 0.0165)                              |
|                       | 1095 | 0.0185 (0.0156, 0.0217)                        | 0.0195 (0.0165, 0.0231)                                           | 0.0191 (0.016, 0.0222)                                 | 0.0192 (0.016, 0.0223)                               |
|                       | 1460 | 0.0207 (0.0175, 0.0245)                        | 0.0212 (0.0179, 0.0252)                                           | 0.0219 (0.0183, 0.0255)                                | 0.0219 (0.0183, 0.0256)                              |

**eFigure 1. Hospital- and Surgeon-Level Annualized Mitral Valve Repair and Replacement (MVRR) Volume**

**A.**

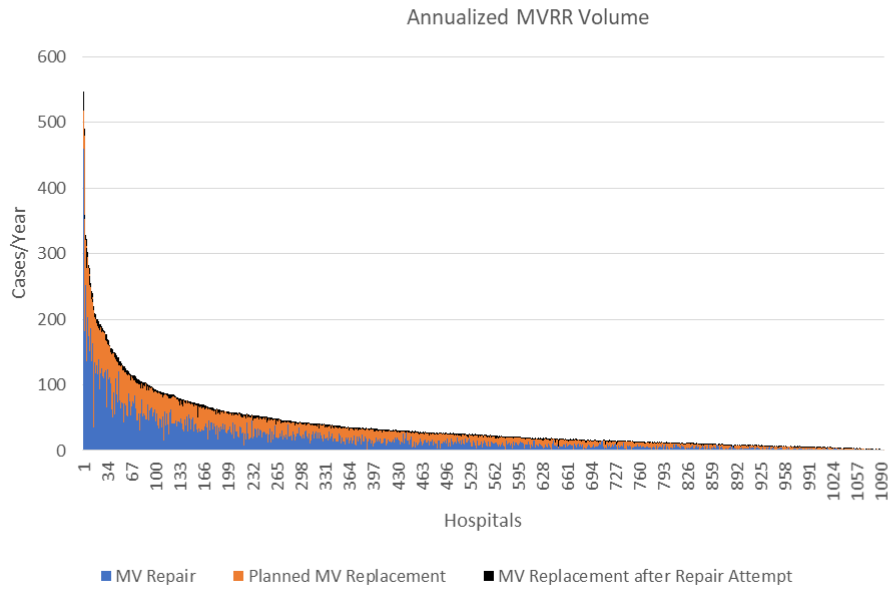

**B.**

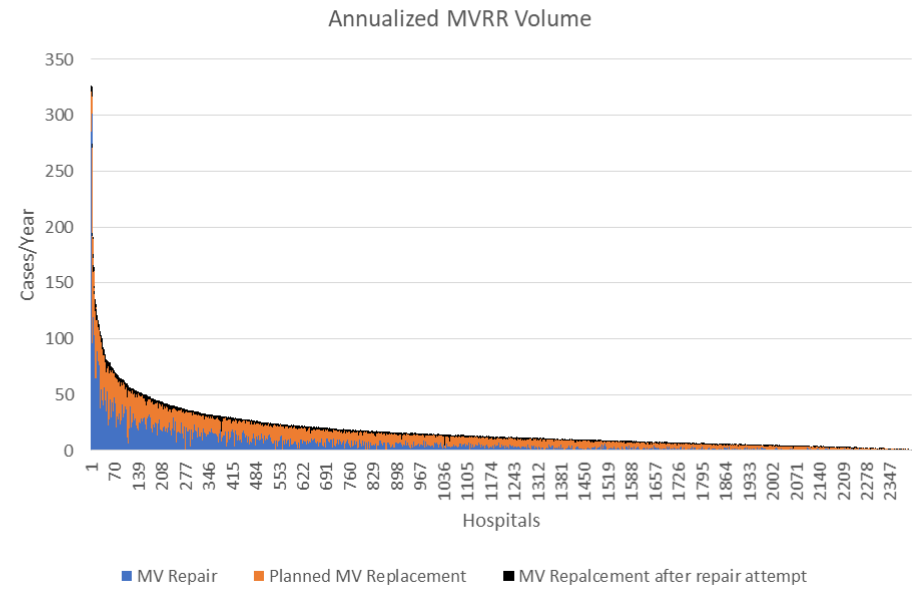

A. Hospital Level. MV repair (blue), planned MV replacement (orange), and MV replacement after MV repair attempt (black). B. Surgeon level MV repair (blue), planned MV replacement (orange), and MV replacement after MV repair attempt (grey).



**eFigure 2. Hospital-Level Linked CMS 1-Year Risk-Adjusted Mortality**

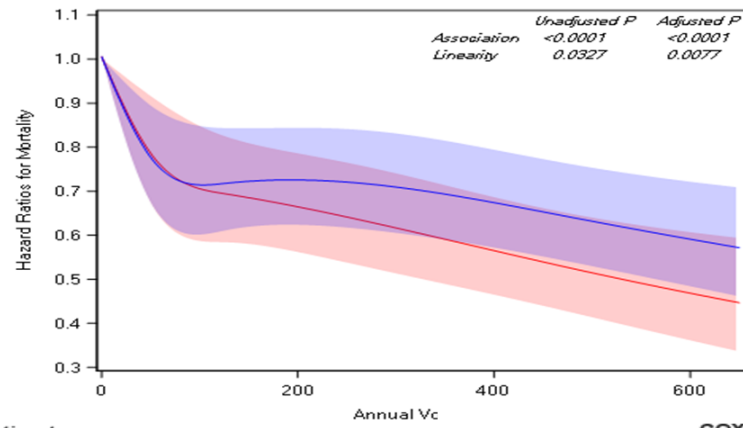

**COX Mortality Risk Estimates Unadjusted**

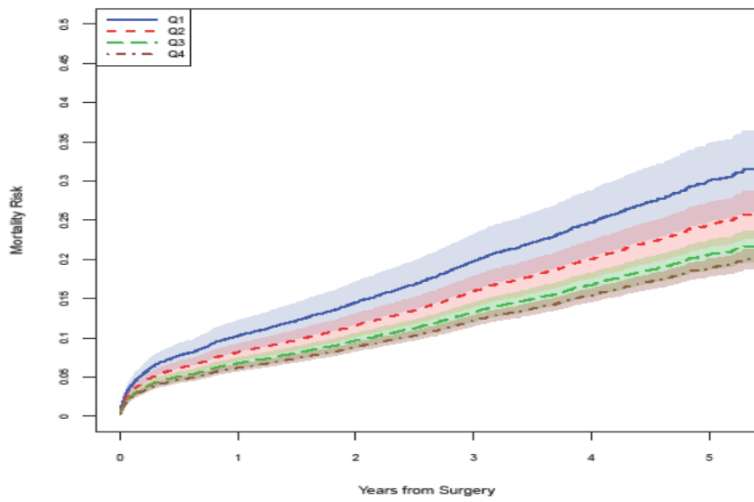

**COX Mortality Risk Estimates Adjusted**

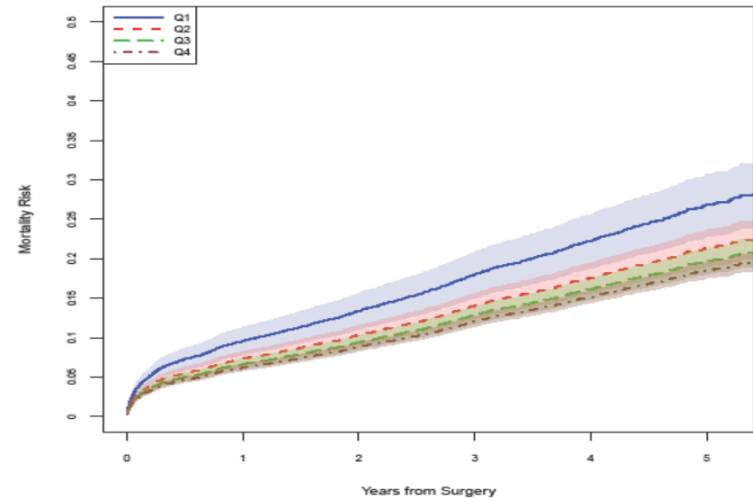

**eFigure 3. Hospital-Level Linked CMS 1-Year HF Hospitalization**

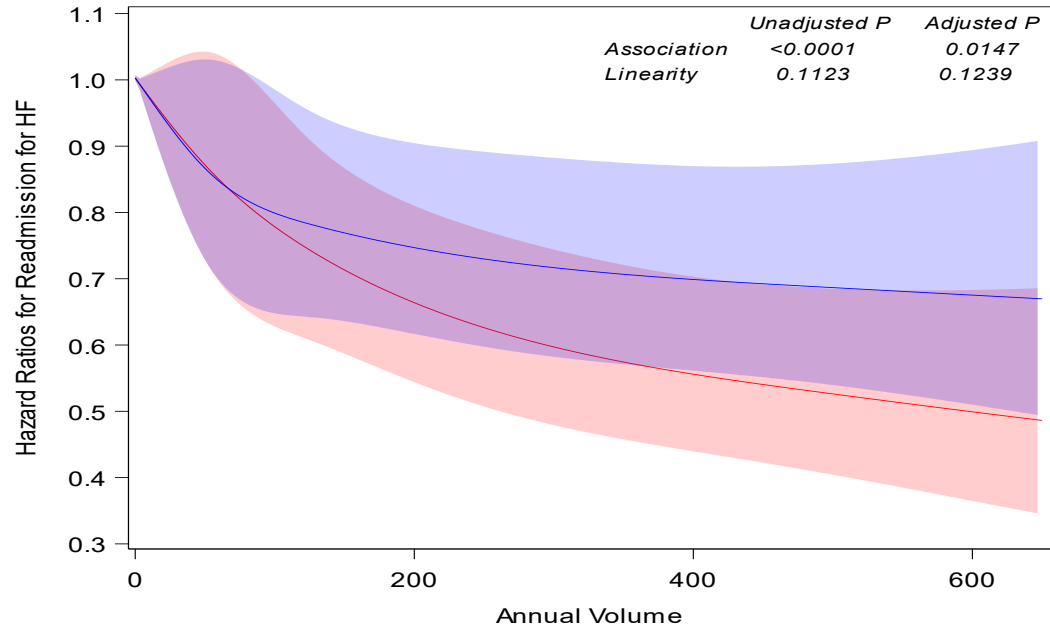

**Risk Estimates  
Cause-Specific Model  
Unadjusted**

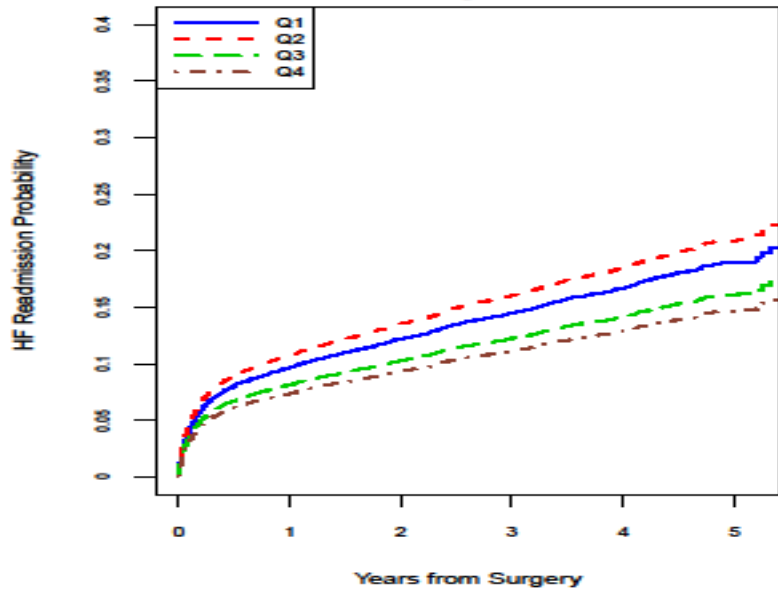

**Risk Estimates  
Cause-Specific Model  
Adjusted**

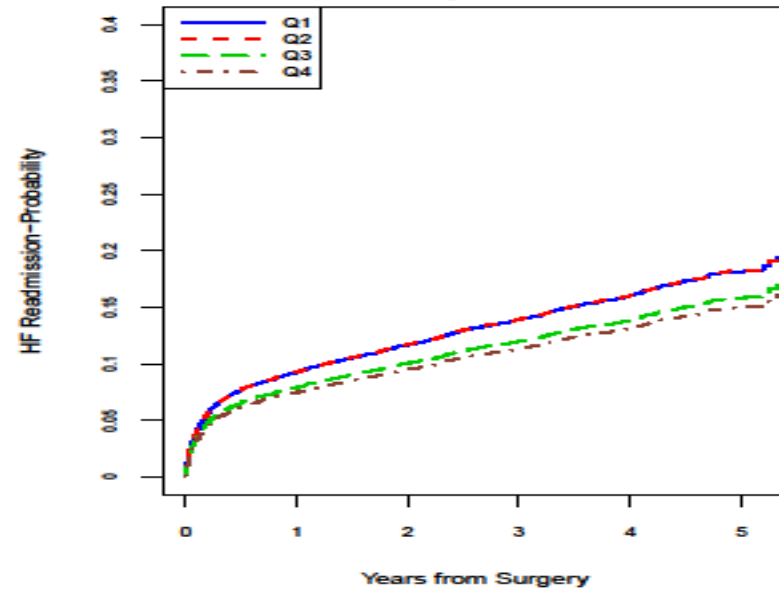

**eFigure 4. Hospital-Level Linked CMS 1-Year MV Reoperation**

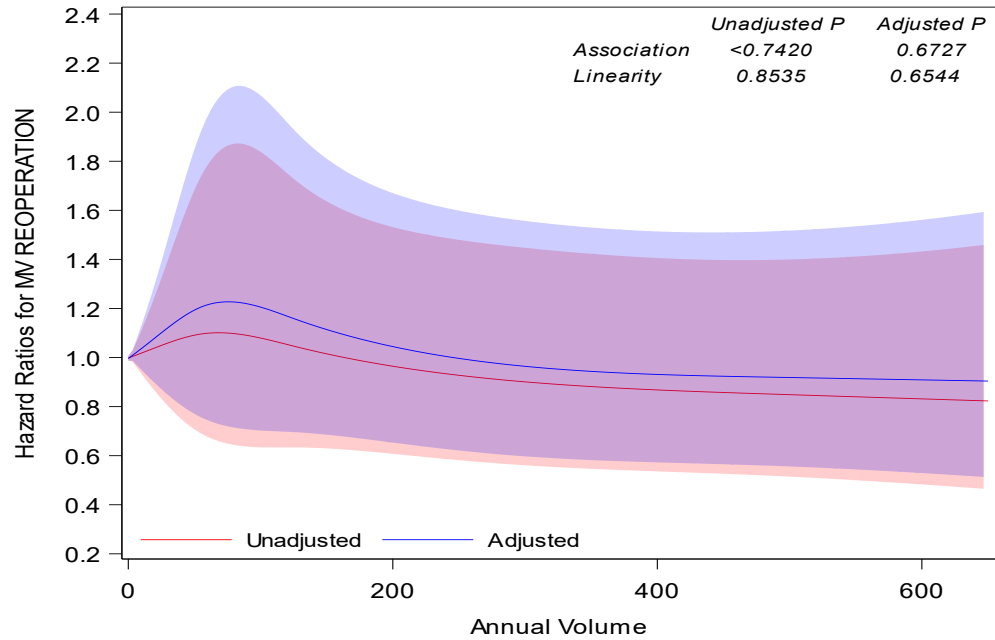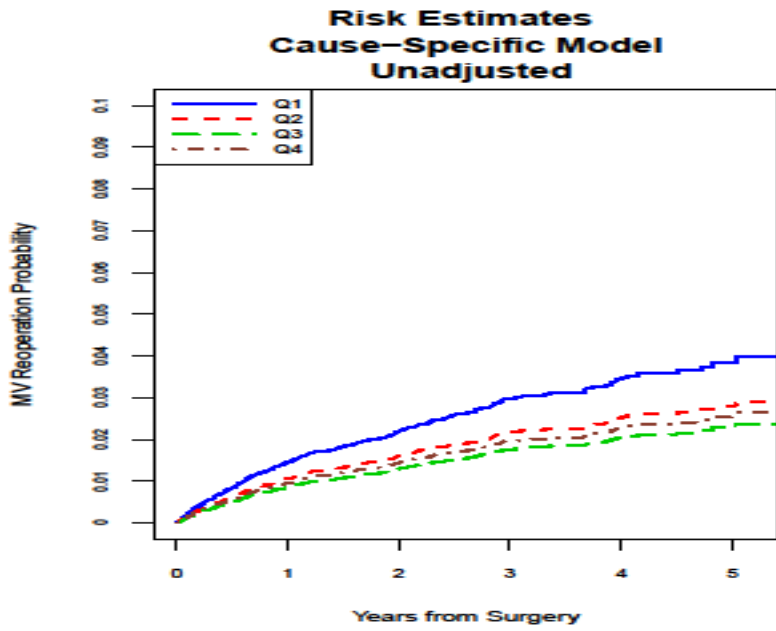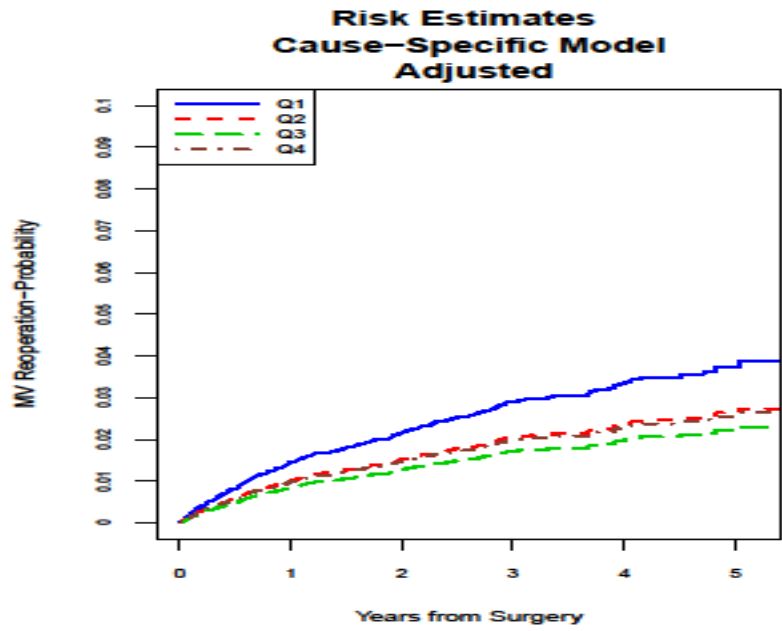

**eFigure 5. Experienced Surgeon Sensitivity Analysis: 30-Day Volume-Outcome Association for Mortality, Composite Major Morbidity Plus Mortality, Attempted MV Repair Rate, Successful MV Repair Rate**

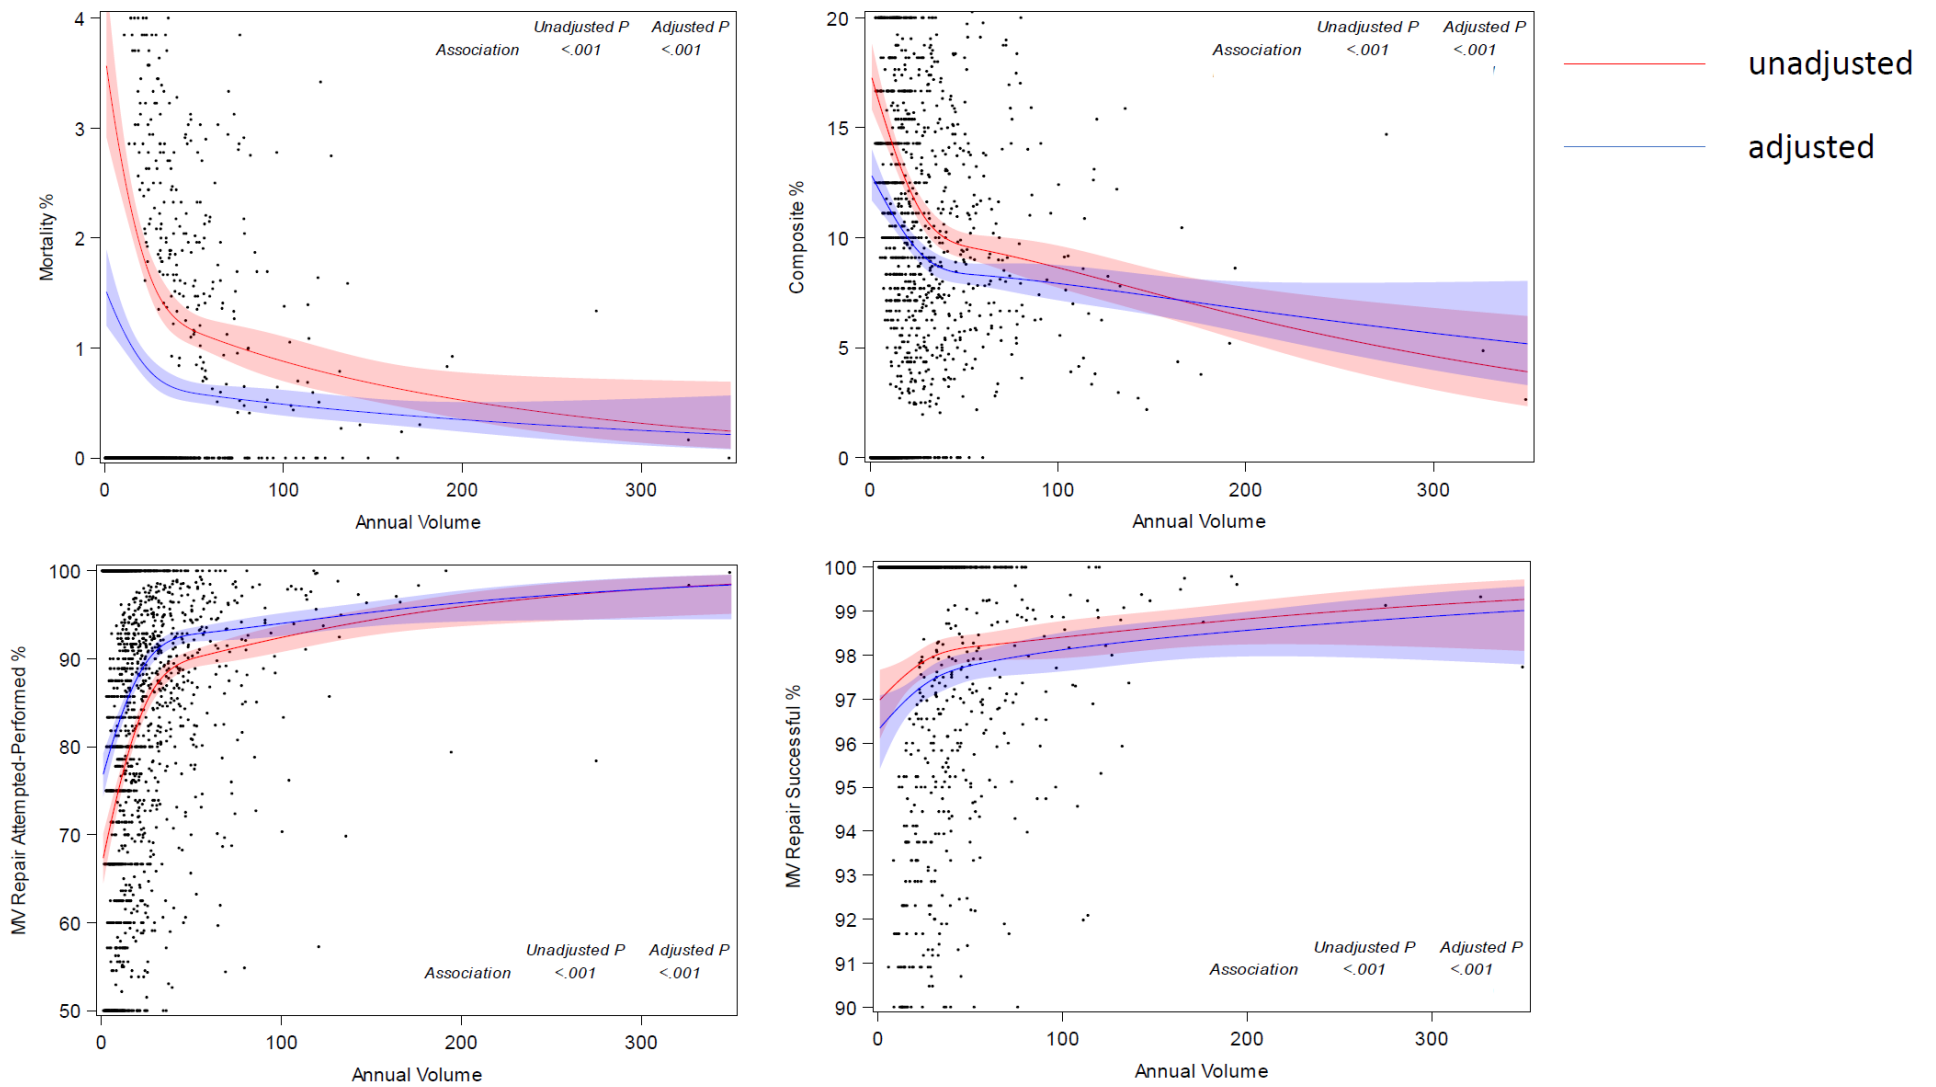

**eFigure 6. All Surgeon-Linked CMS 1-Year Risk-Adjusted Mortality**

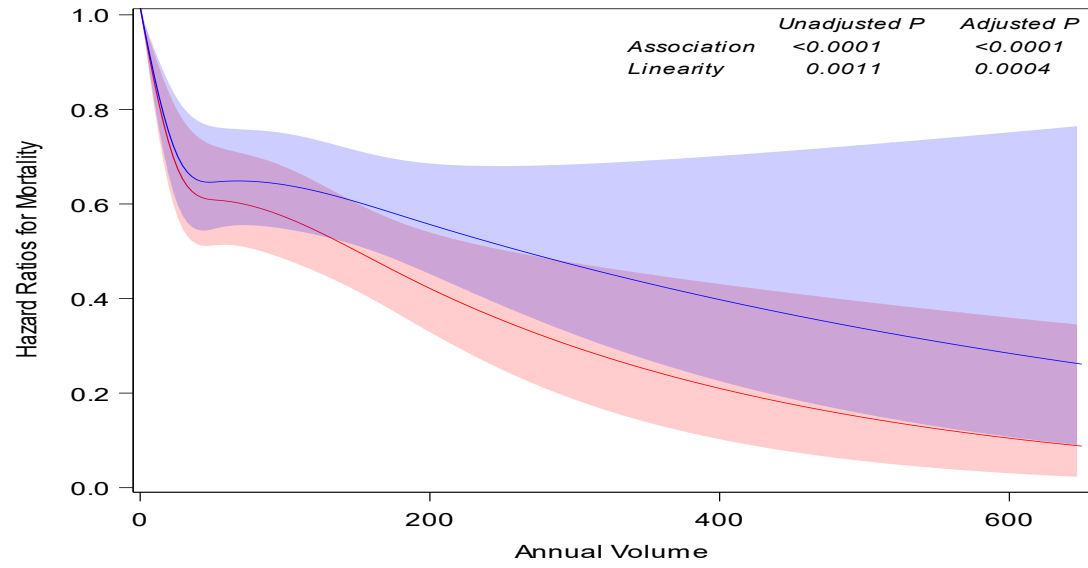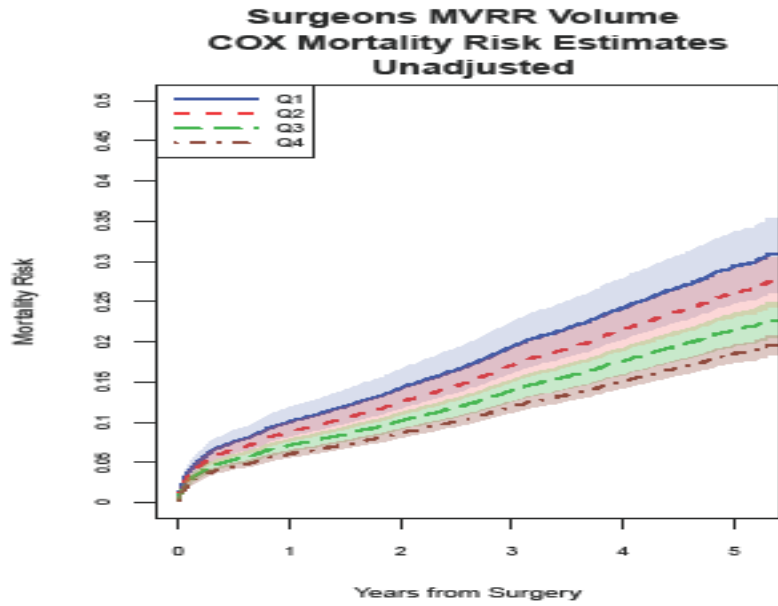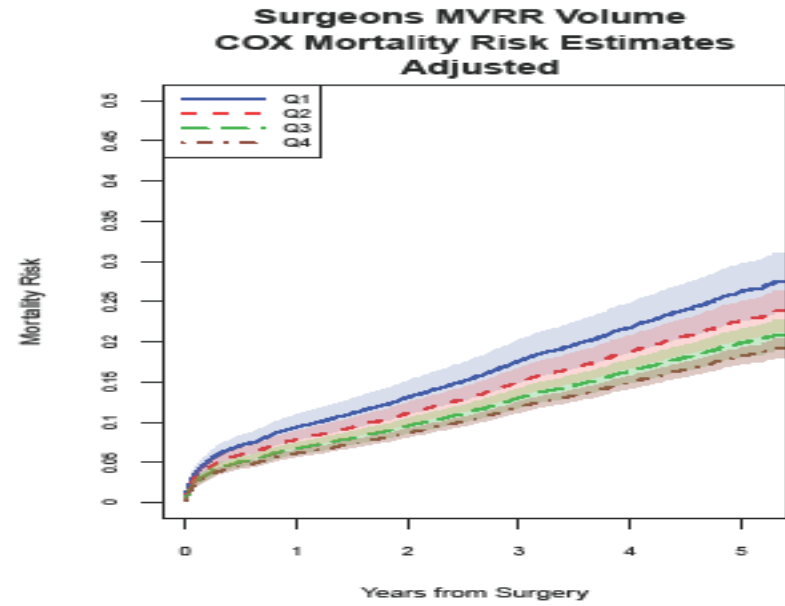

eFigure 7. All Surgeon-Linked CMS 1-Year HF Hospitalization

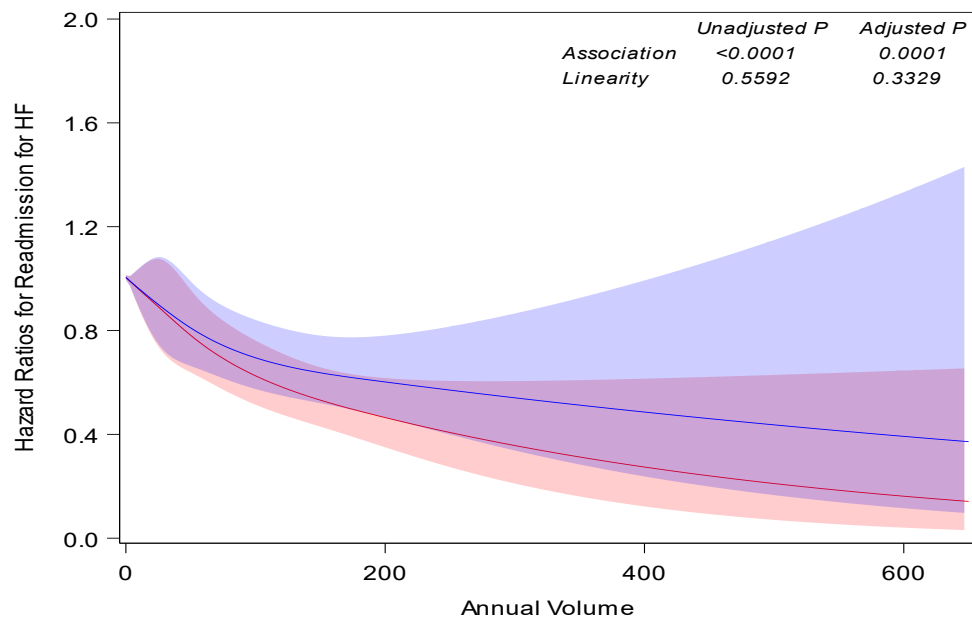

**Risk Estimates  
Cause-Specific Model  
Unadjusted**

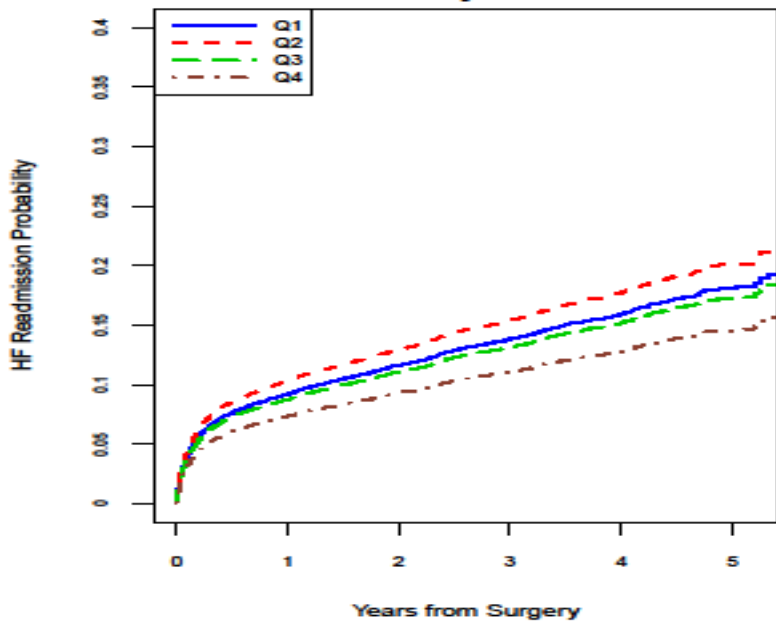

**Risk Estimates  
Cause-Specific Model  
Adjusted**

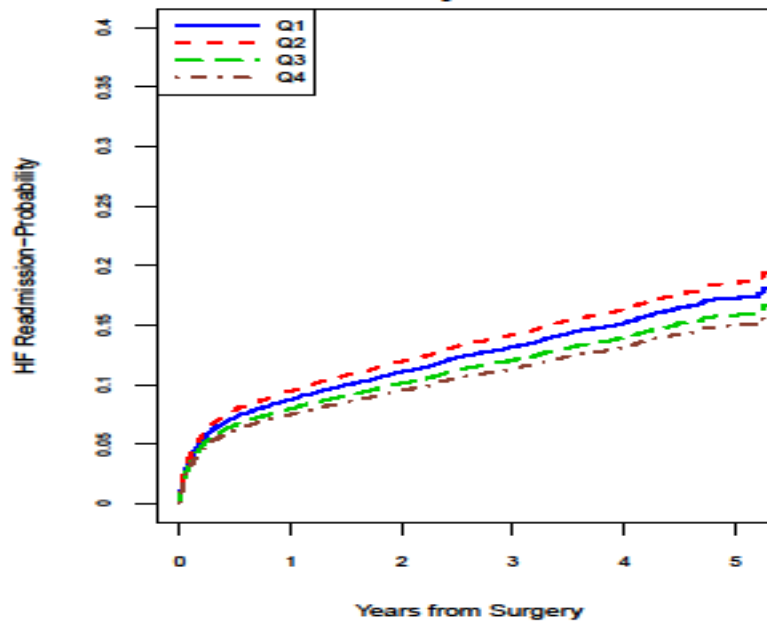

eFigure 8. All Surgeon-Linked CMS 1-Year MV Reoperation

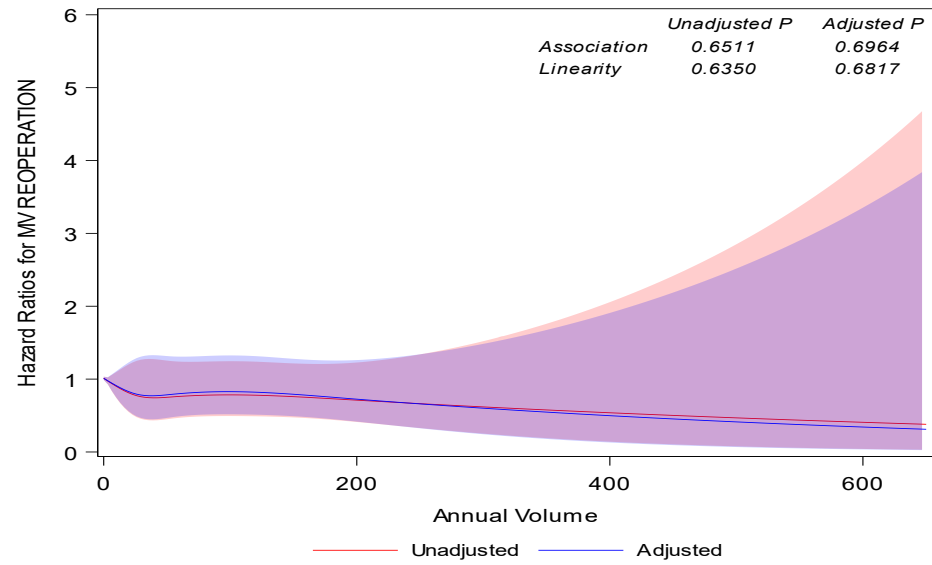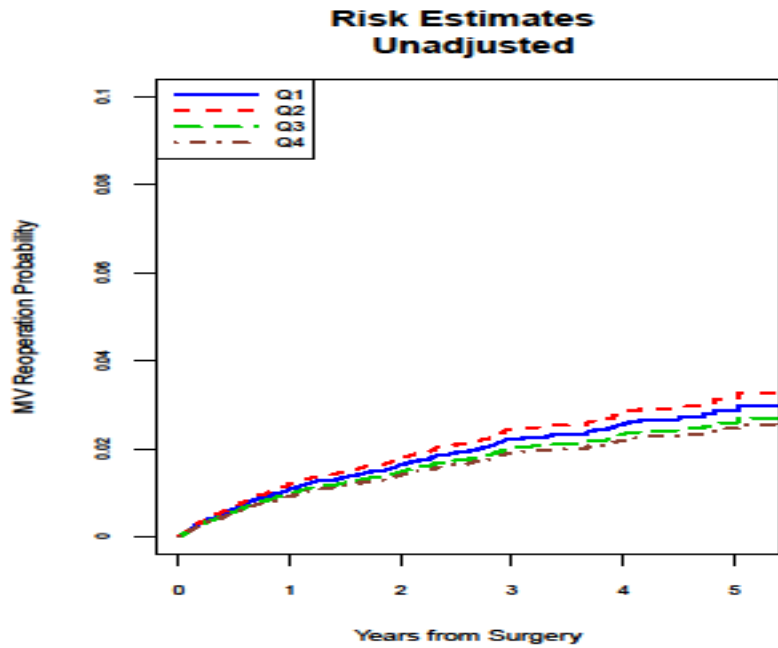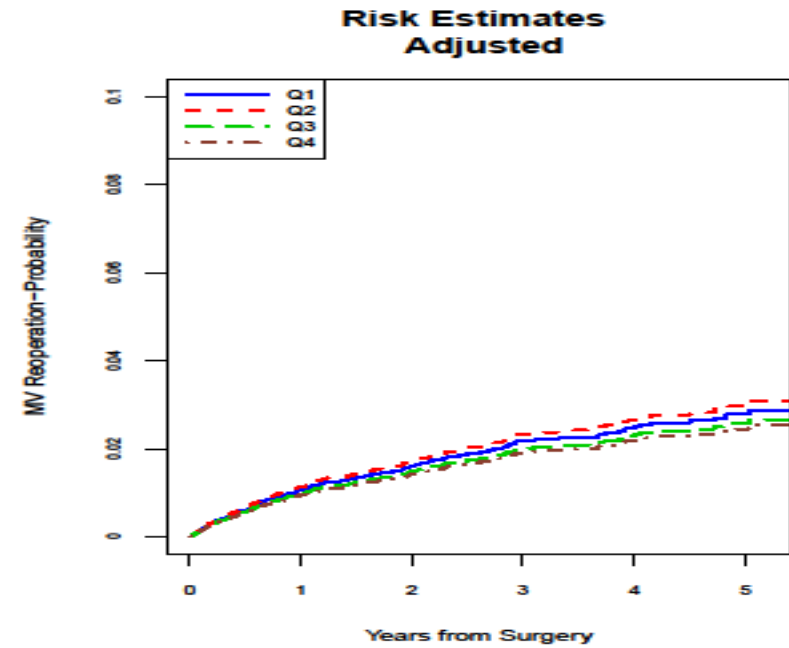

**eFigure 9. Experienced Surgeon-Linked CMS 1-Year Risk-Adjusted Mortality**

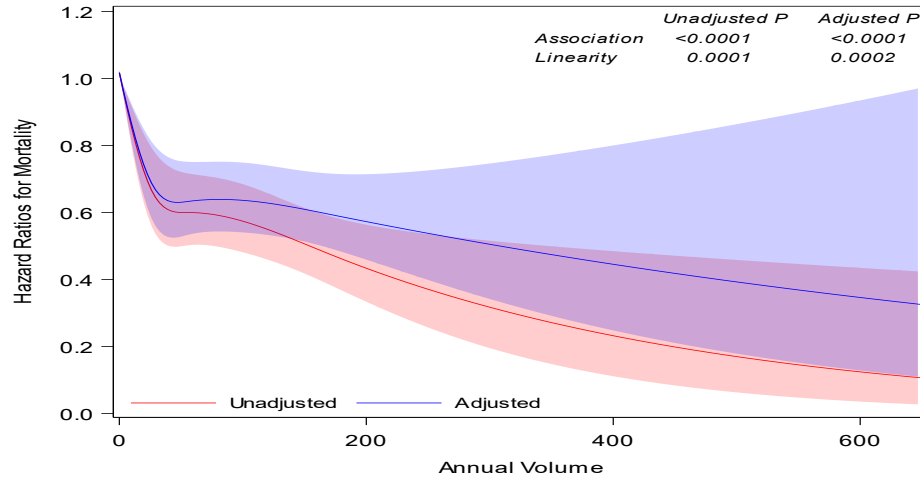

**Experienced Surgeons MVRR Volume  
COX Mortality Risk Estimates  
Unadjusted**

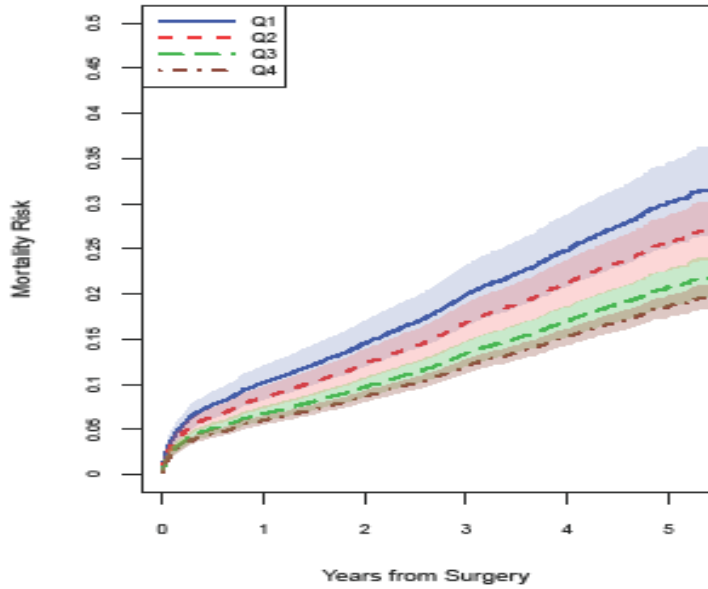

**Experienced Surgeons MVRR Volume  
COX Mortality Risk Estimates  
Adjusted**

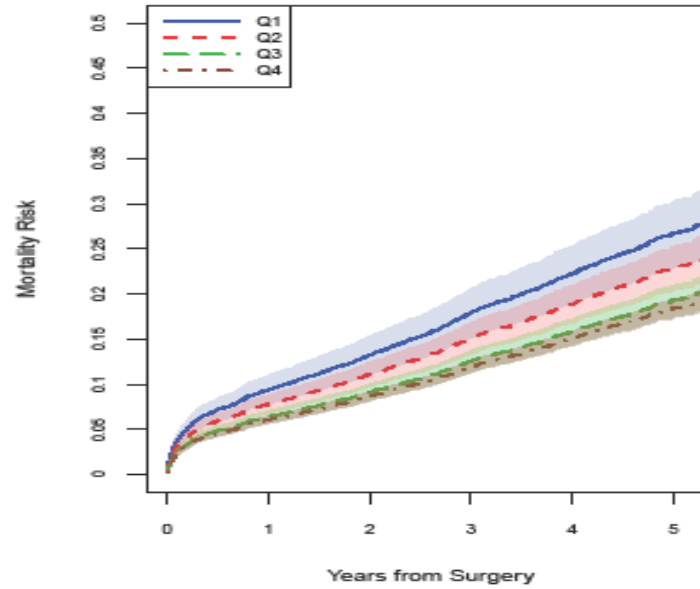



**eFigure 10. Experienced Surgeon-Linked CMS 1-Year HF Hospitalization**

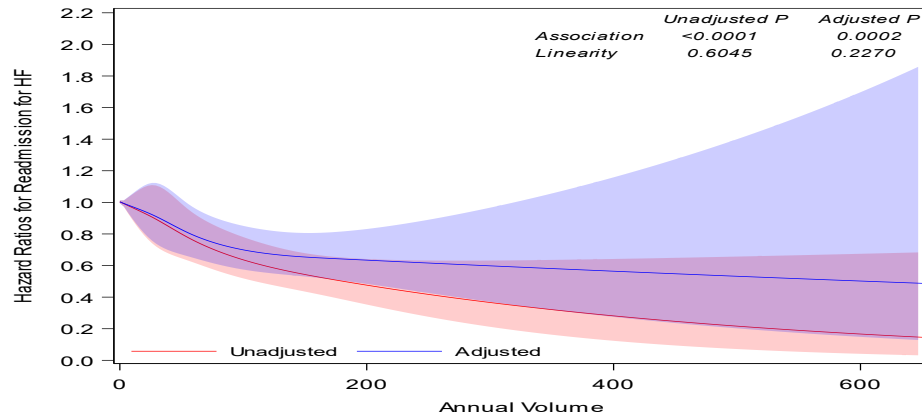

**Risk Estimates Unadjusted**

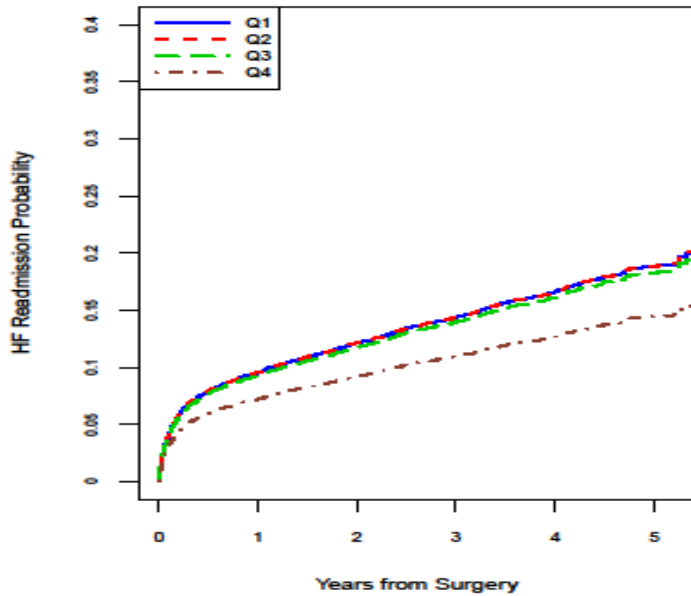

**Risk Estimates Adjusted**

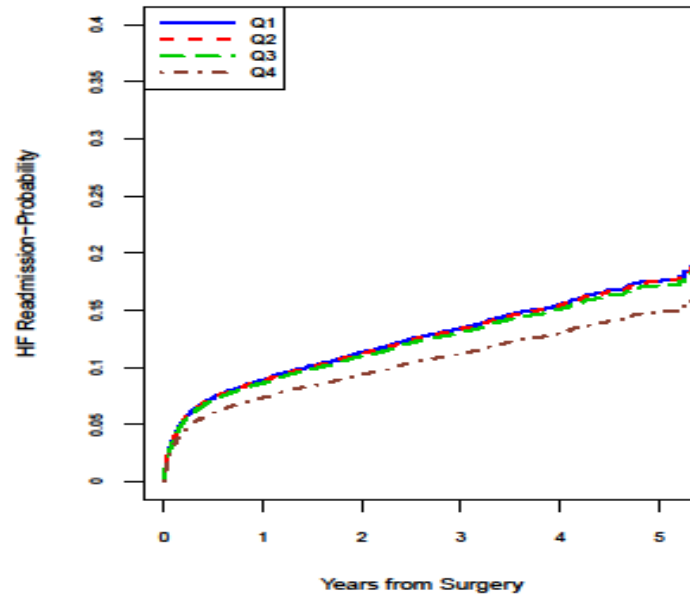

eFigure 11. Experienced Surgeon-Linked CMS 1-Year MV Reoperation

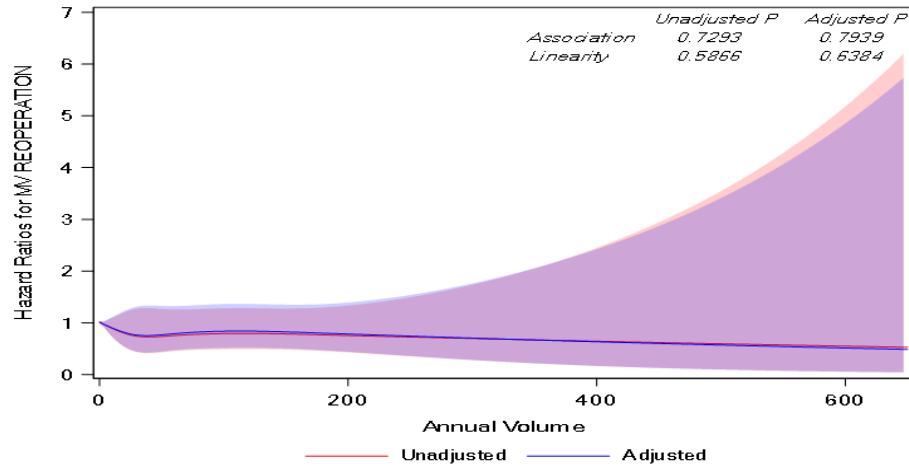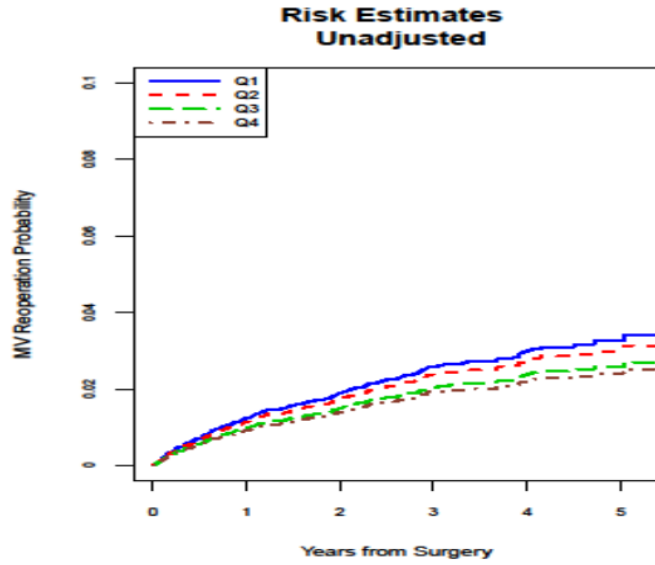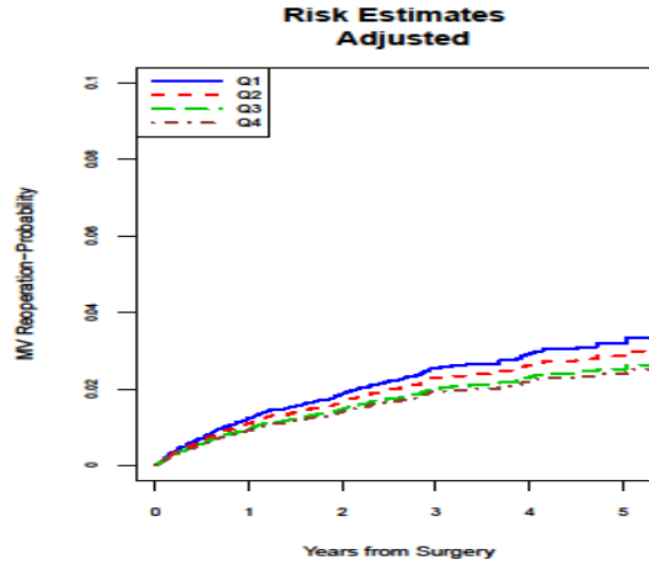

## **eResults. Surgeons With 3 Years of Experience**

### Sensitivity Analysis of Surgeons with 3 years of Experience

For the surgeon-level analysis, we pre-specified a sensitivity analysis to account for the operator learning curve by excluding surgeons with fewer than three years MV surgical experience documented in STS ACSD, and then repeating the surgeon level analysis as outlined in the Methods.

### Outcomes of Surgeons with at least 3 years' Experience

As a pre-specified sensitivity analysis, the surgeon level analysis was repeated for surgeons with at least 3 years' of experience. This sub-analysis included 94.0% of the total cohort of operations (51,975/55,311) performed by 89.3% of the total cohort of surgeons (2,152/2,410). The median experienced surgeon MVRR volume was 13 (IQR 7-24) and the median experienced surgeon MV repair volume was 6 (IQR 2-13). These findings were not substantially different to the overall cohort.

For experienced surgeon level 30-day outcomes, there remained a significant, nonlinear association between 30-day mortality, 30-day composite, 30-day MV repair attempted, and 30-day successful MV repair (adjusted and unadjusted) and annualized experienced surgeon MVRR surgical volume (Supplemental Figure S5 and Supplemental Table S7). There was no interaction by surgery type (repair or replacement) between the association of annualized experienced surgeon MVRR volume and any of these outcomes.

Similarly, for experienced surgeon level 1-year outcomes, there remained higher adjusted mortality in the lowest volume quartile centers (9.42%, 95% CI 7.84%-10.96%) vs. the highest volume quartile centers (6.06%, 95% CI 5.67%-6.44%) (HR 1.62, 95% CI 1.34 – 1.97) (Supplemental Figure S9 and Supplemental Table S11). There was no significant difference in 1-year HF hospitalization or MV reoperation rates between the lowest volume quartile and the highest volume quartile (Supplemental Figures S10 and S11 and Supplemental Tables S12 and S13). There was no interaction by surgery type (repair or replacement) between the association of annualized experienced surgeon MVRR volume and any of these outcomes. These findings were not substantially different than the overall surgeon outcomes.
